# Supplementary material for: Aliphatic amines from waste polyolefins by tandem pyrolysis, hydroformylation, and reductive amination
Source: Royal Society of Chemistry journal article supplement (doi:10.1039/d4gc01013b), 2024-01-01
Supplement: d4gc01013b1.pdf [file d4gc01013b1.pdf]

## **Aliphatic amines from waste polyolefins by tandem pyrolysis, hydroformylation, and reductive amination**

*Houqian Li,<sup>1</sup> Amy C. Cuthbertson,<sup>2</sup> Ahmad Amer Alamer,<sup>1</sup> Victor S. Cecon,<sup>3</sup> Harish Radhakrishnan,<sup>4</sup> Jiayang Wu,<sup>1</sup> Greg W. Curtzwiler,<sup>3</sup> Keith L. Vorst,<sup>3</sup> Xianglan Bai,<sup>4</sup> Clark R. Landis,<sup>5</sup> Gregg T. Beckham,<sup>2</sup> George W. Huber<sup>1,\*</sup>*

<sup>1</sup> Department of Chemical and Biological Engineering, University of Wisconsin-Madison; Madison, WI 53706, USA

<sup>2</sup> Renewable Resources and Enabling Sciences Center, National Renewable Energy Laboratory, Golden, CO 80401, USA

<sup>3</sup> Polymer and Food Protection Consortium, Department of Food Science and Human Nutrition, Iowa State University, Ames, IA 50011, USA

<sup>4</sup> Department of Mechanical Engineering, Iowa State University, Ames, IA 50011, USA

<sup>5</sup> Department of Chemistry, University of Wisconsin-Madison; Madison, WI 53706, USA

\*Corresponding author: [gwhuber@wisc.edu](mailto:gwhuber@wisc.edu)

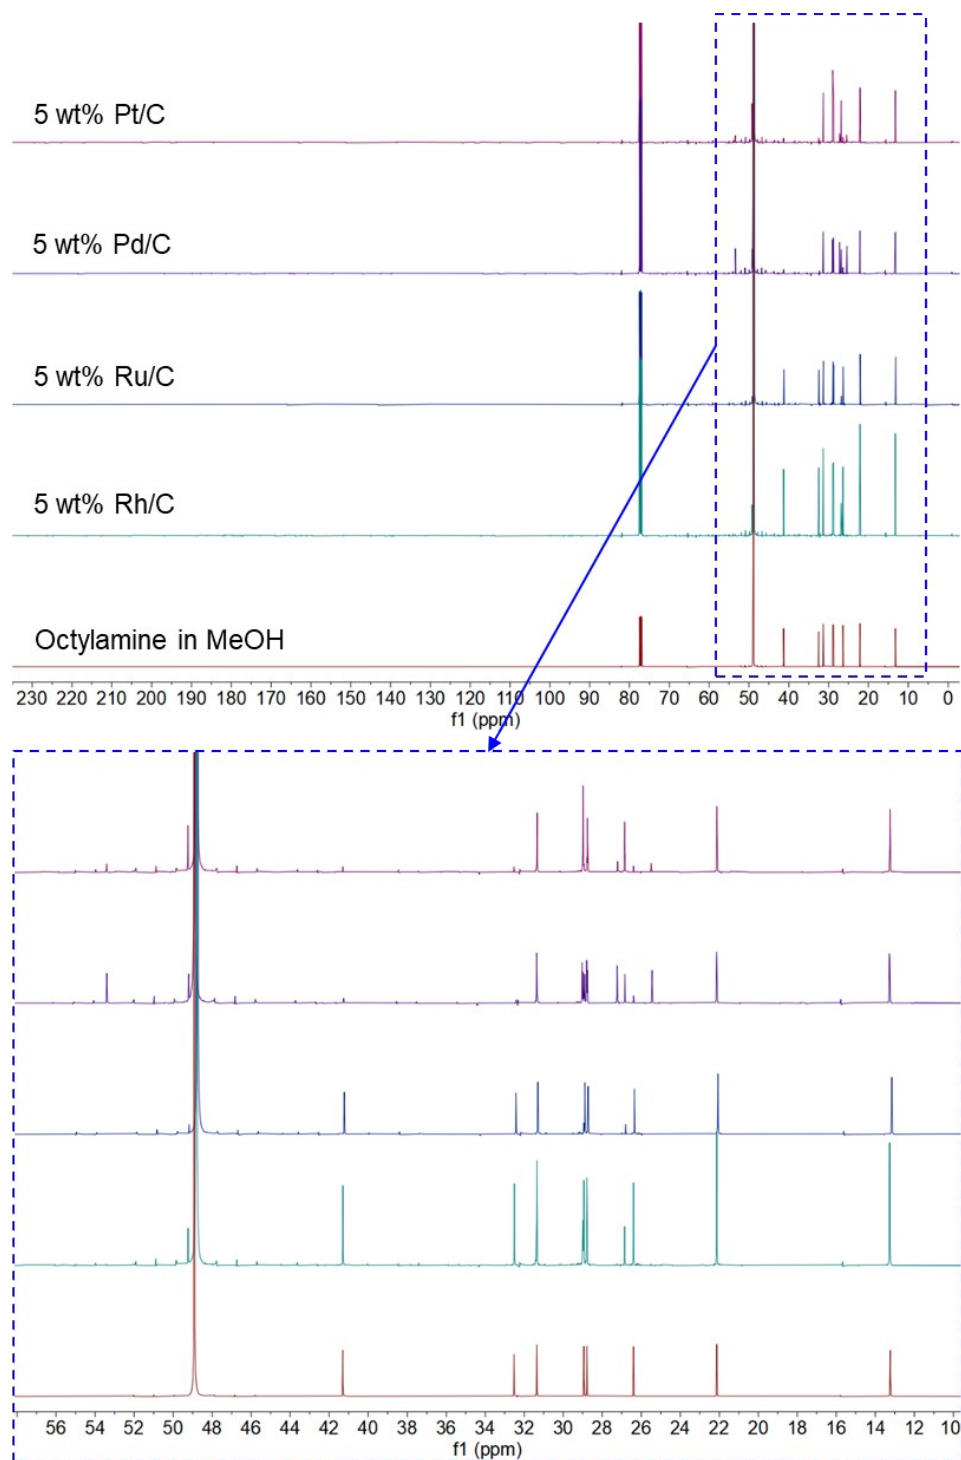

**Figure S1.** Quantitative  $^{13}\text{C}$  NMR spectra were obtained for octanal reductive amination after complete conversion over Pt/C, Pd/C, Rh/C, and Ru/C (all 5 wt% metal). The spectrum of octylamine is included as a reference.

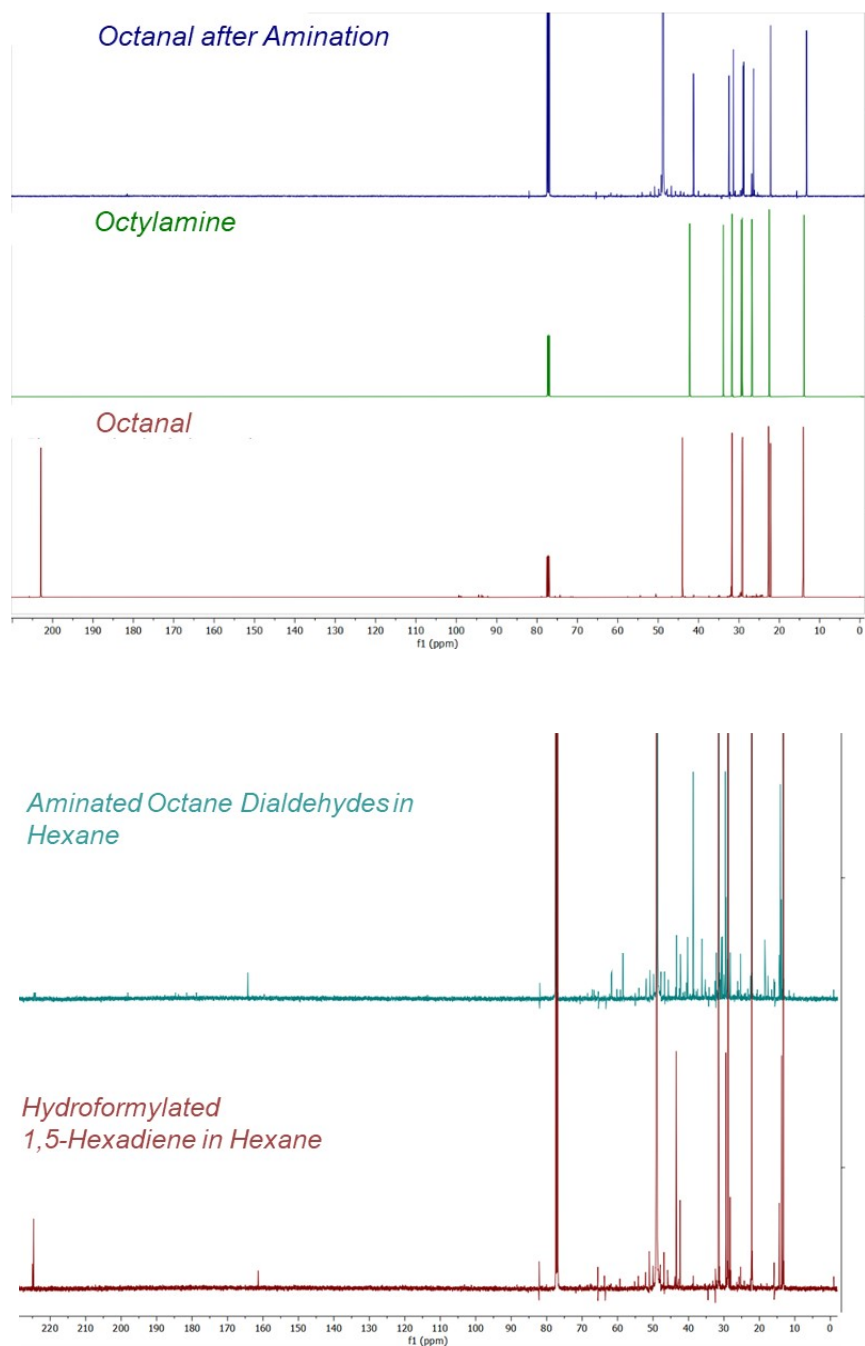

**Figure S2.** Quantitative  $^{13}\text{C}$  NMR spectra of model compounds animation catalyzed by 5 wt% Ru/C. Reaction conditions: Batch Reactor, 90 °C, 800 rpm, 40 Bar  $\text{H}_2$ , 150 min reaction time, 0.43 mol/L aldehydes in 7N  $\text{NH}_3/\text{MeOH}$  solution. Ru/Aldehydes=1/50 (molar ratio). The peak at 50 ppm in “*Octanal after Amination*” spectrum was resulted from methanol as a solvent in reductive amination.

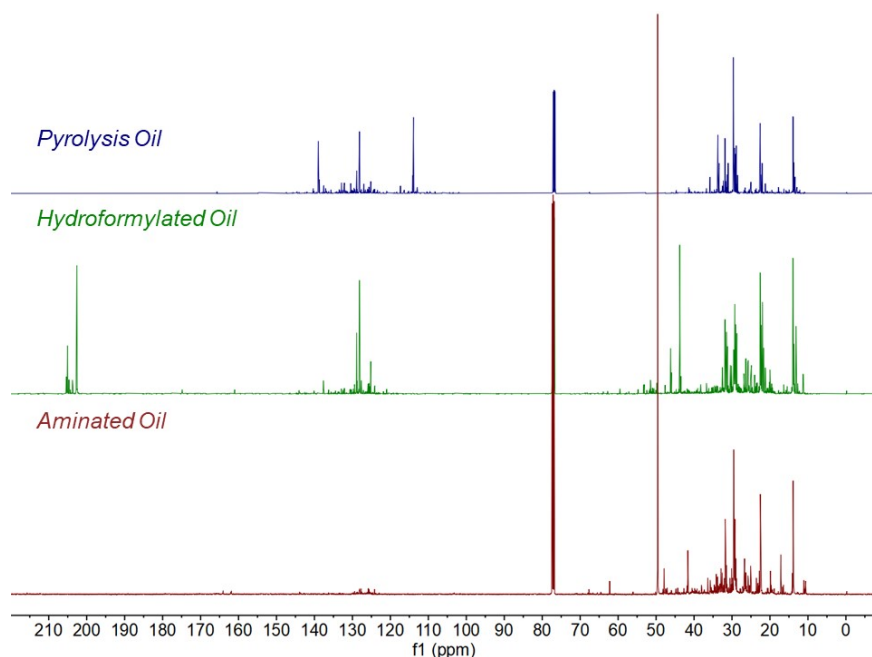

**Figure S3.** Complete quantitative  $^{13}\text{C}$  NMR spectra of pyrolysis oil (A), hydroformylated pyrolysis oil (B), and aminated oil (C). The peaks belonging to aromatic species decreased in the aminated oil, likely as a result of rotary evaporation after the amination reaction.

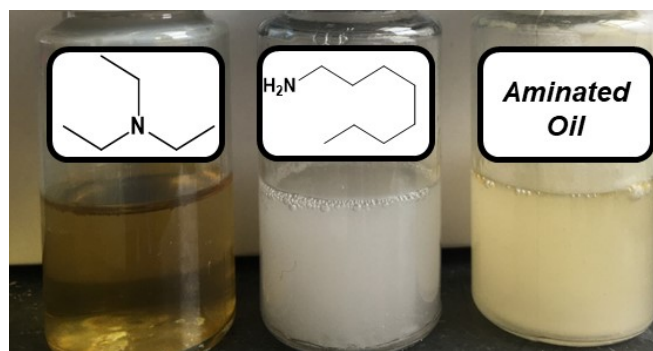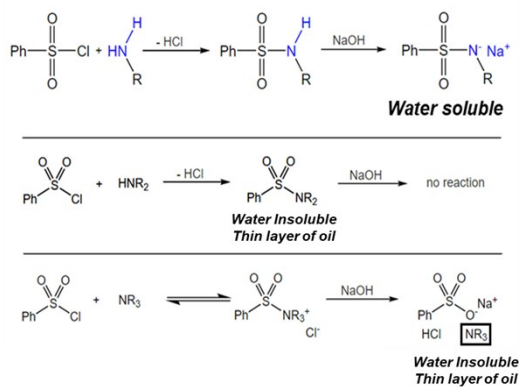

**Figure S4.** Hinsberg Test of tertiary amine, primary amine and the aminated oil.

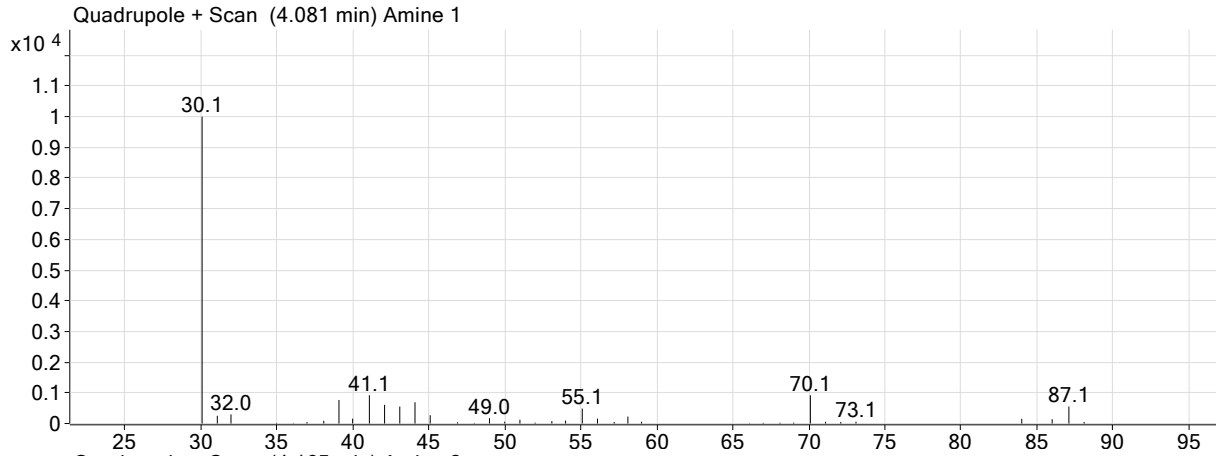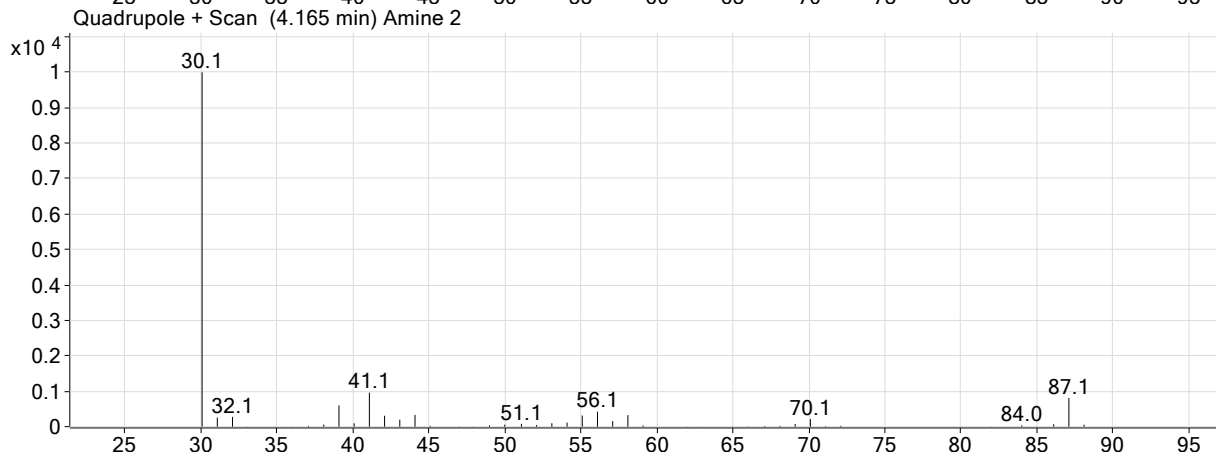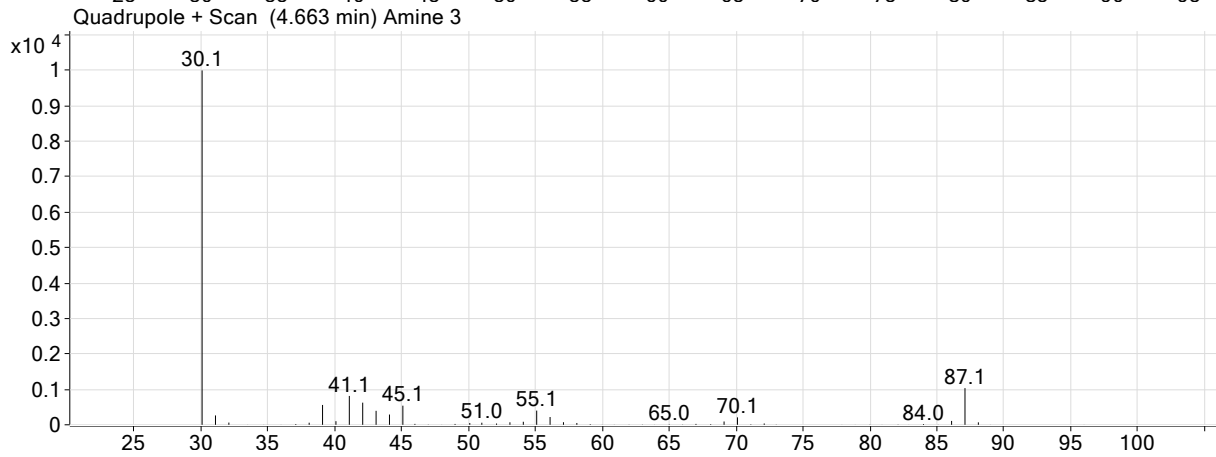

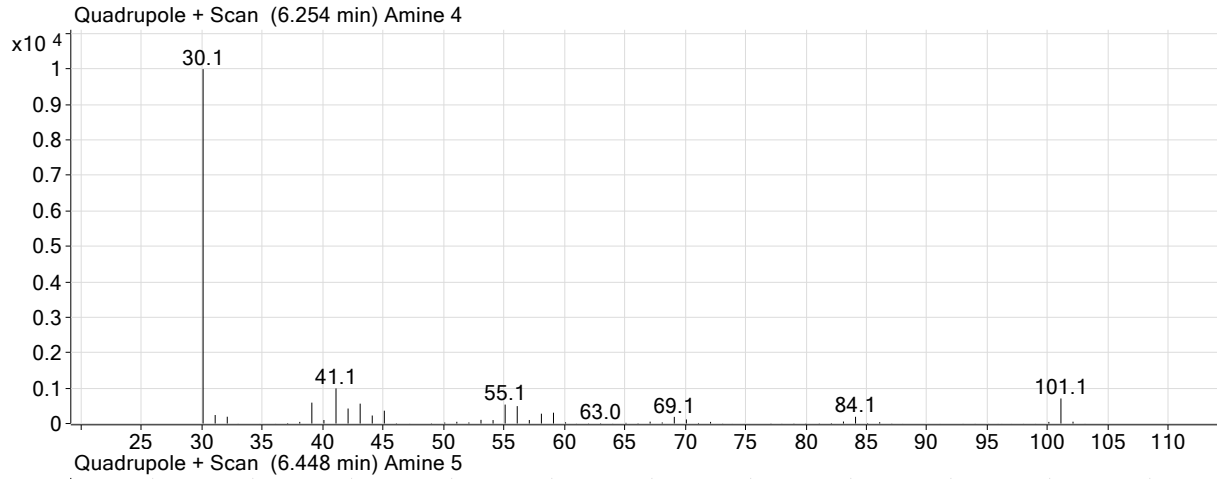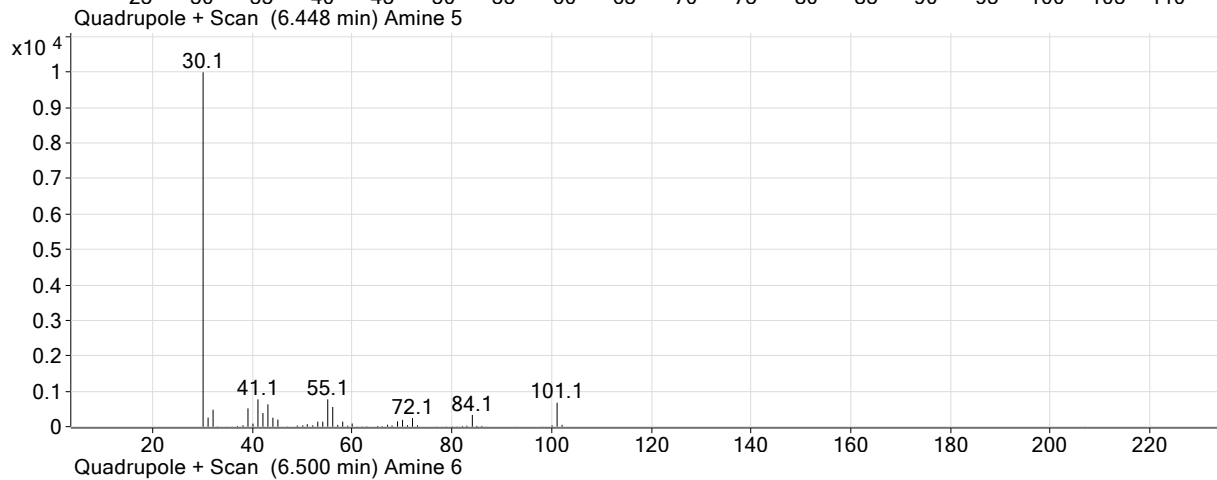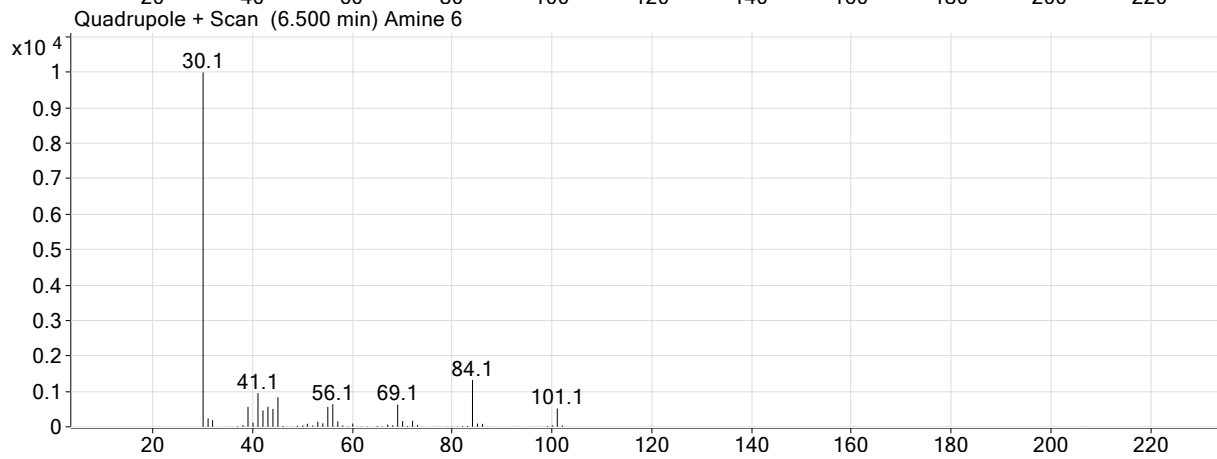

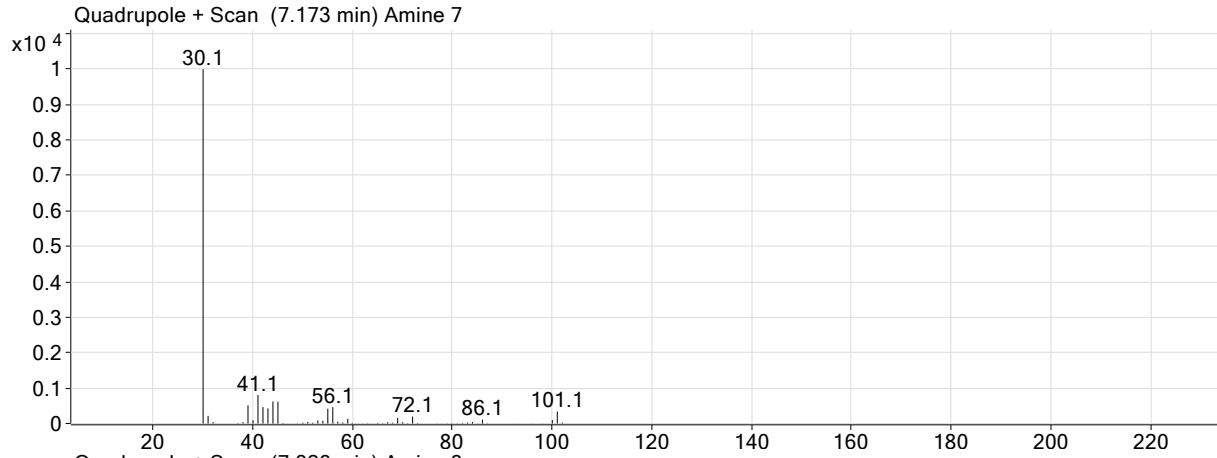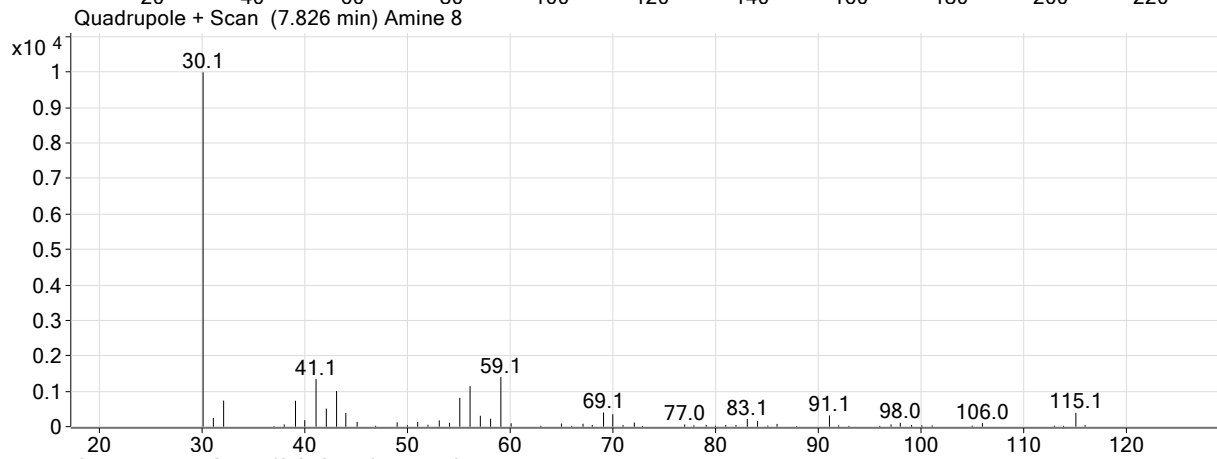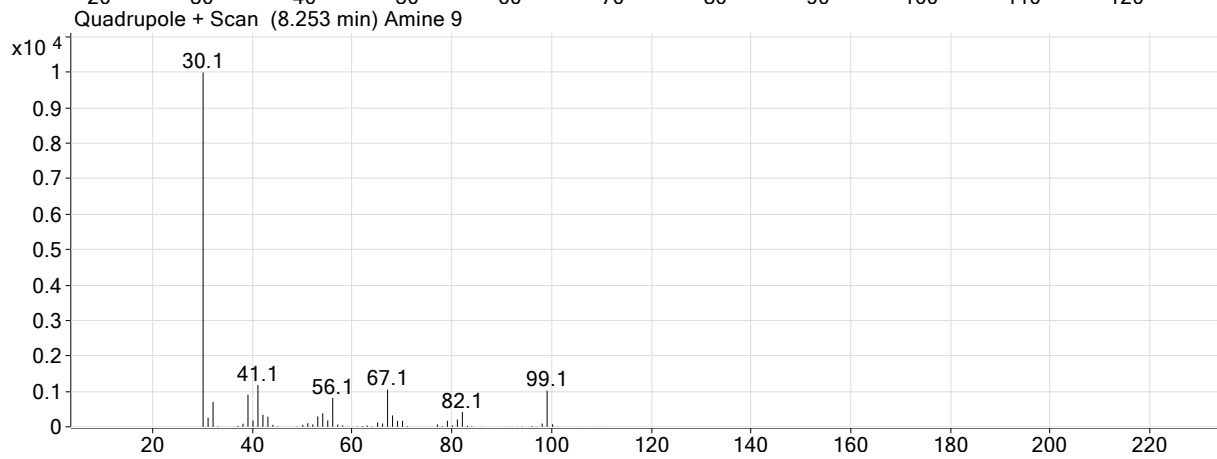

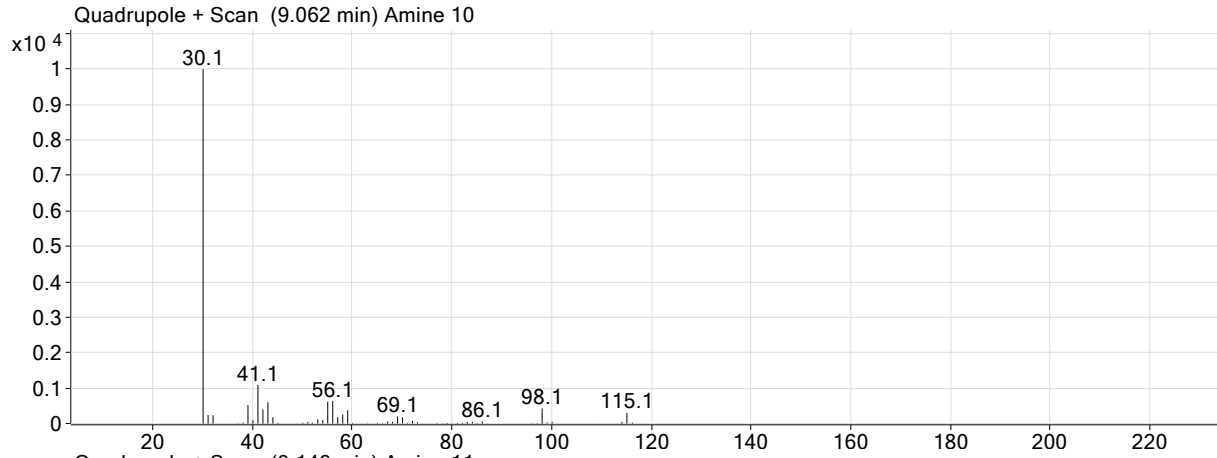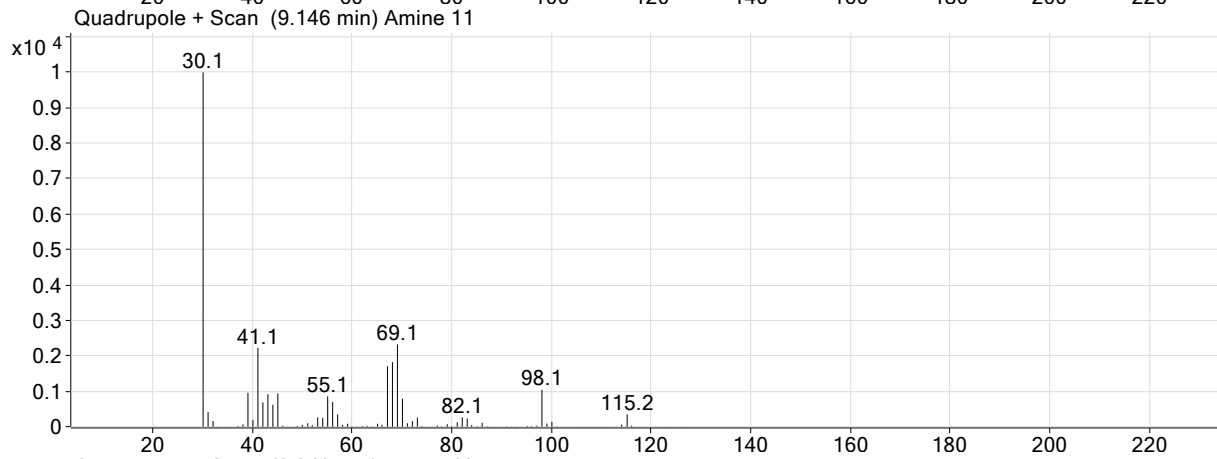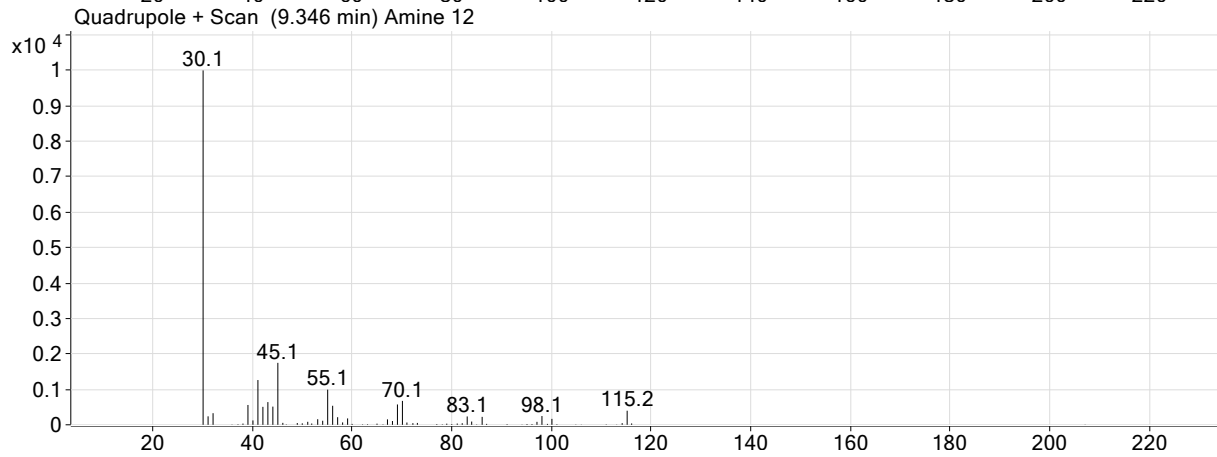



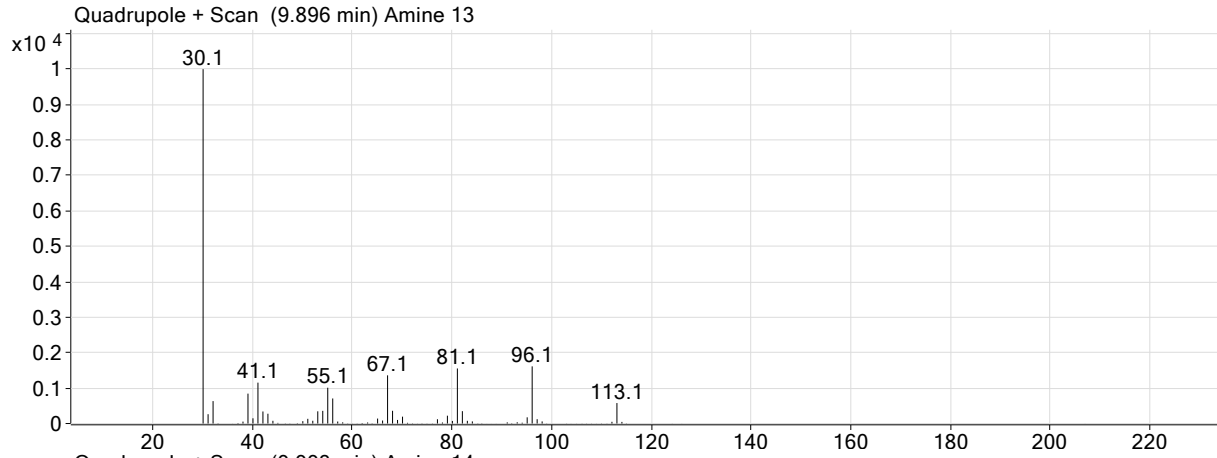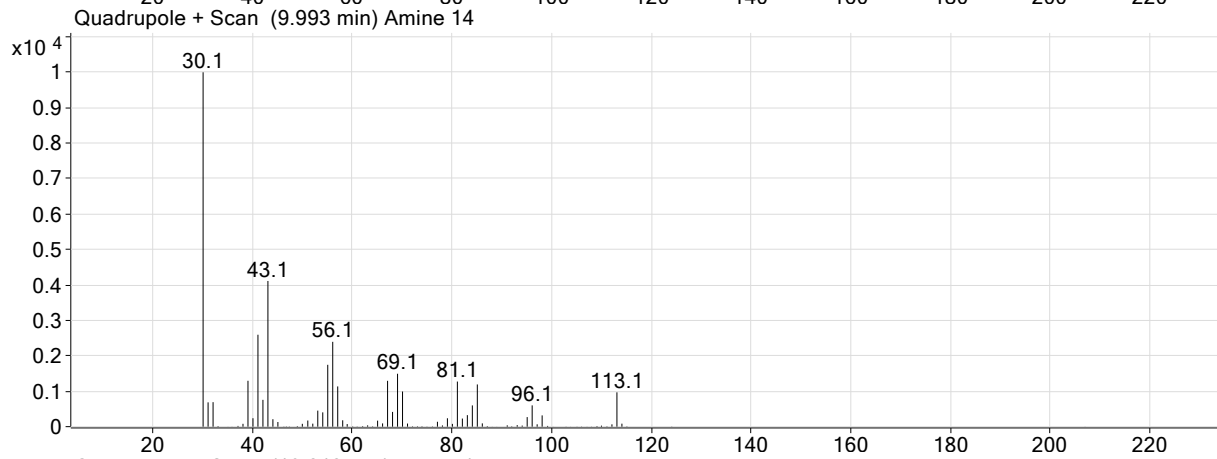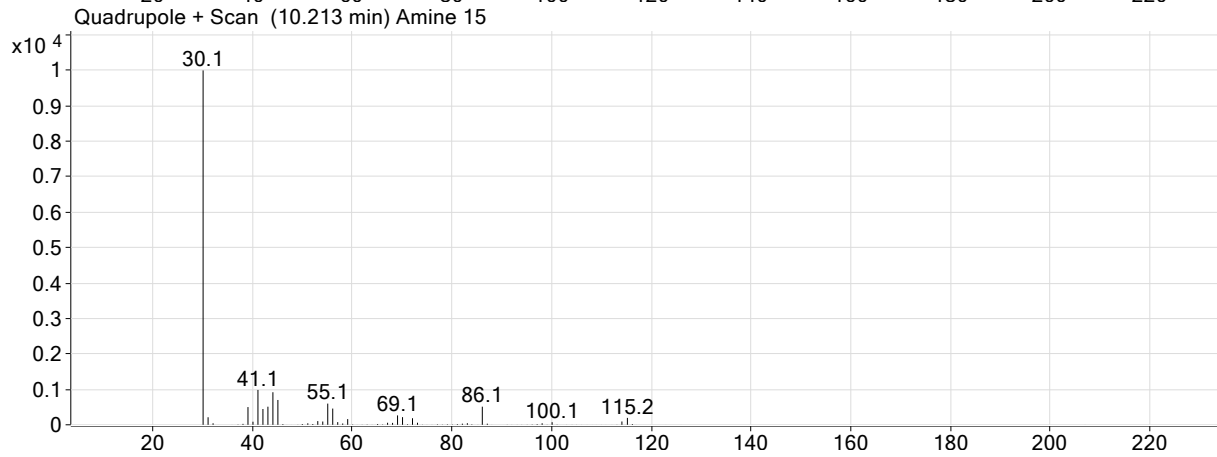

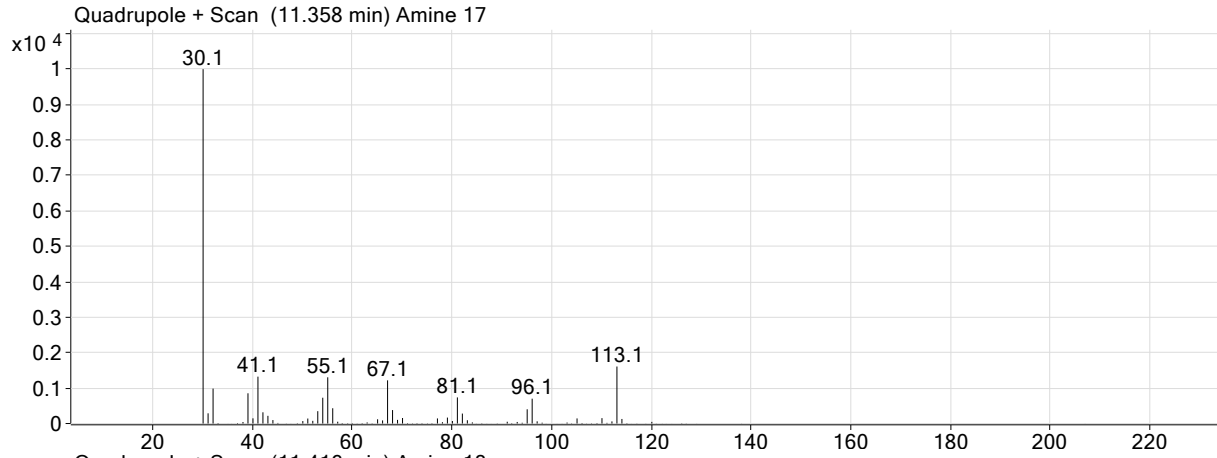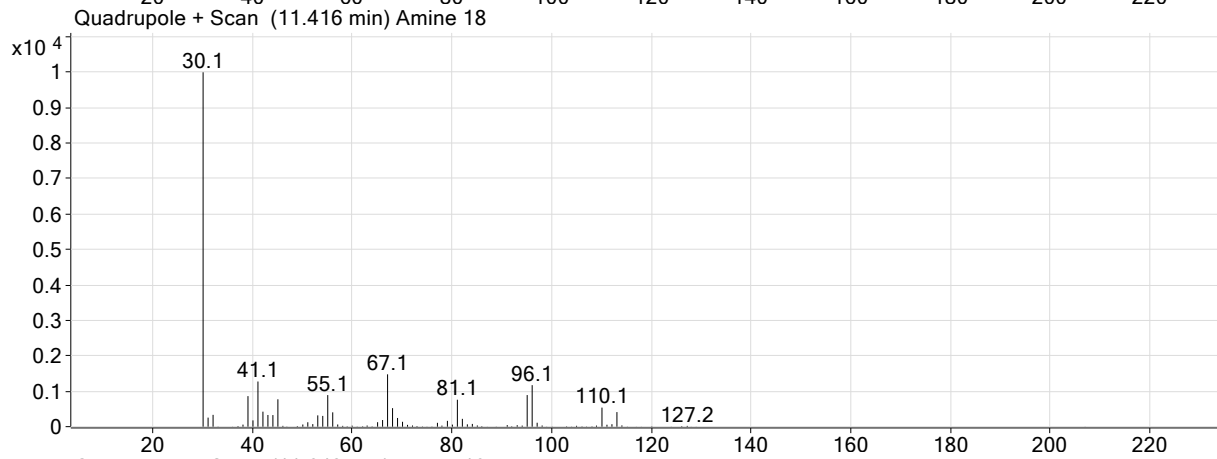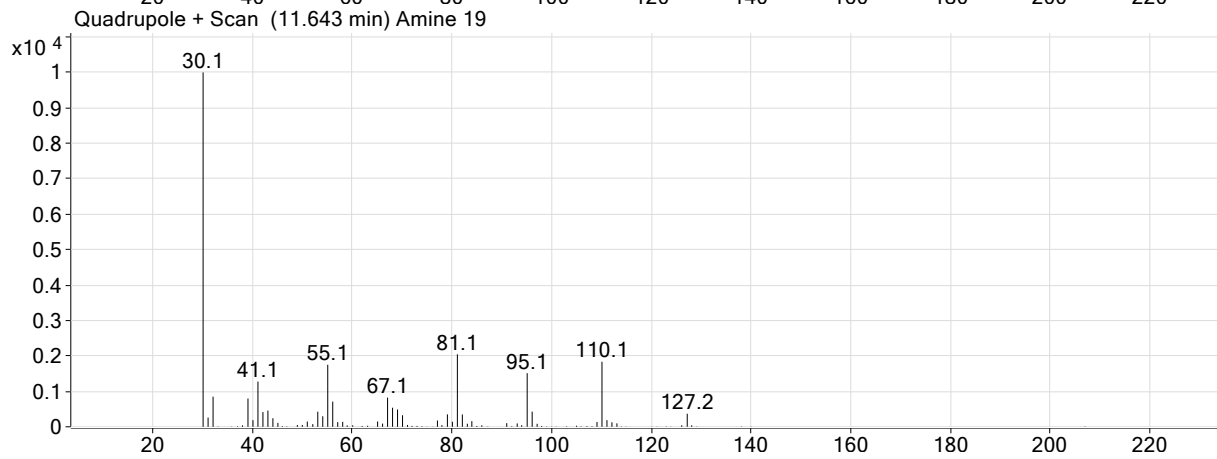

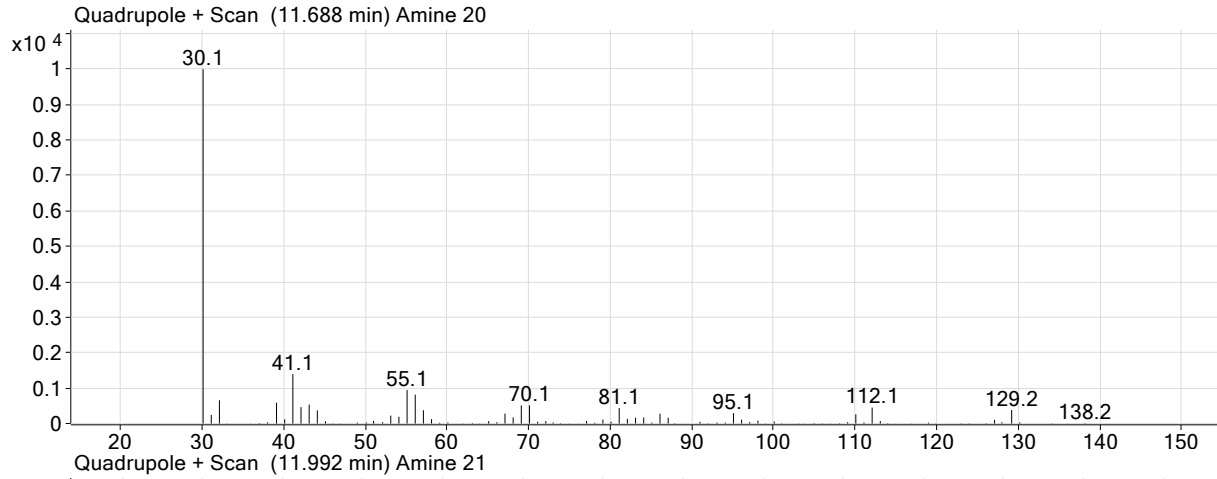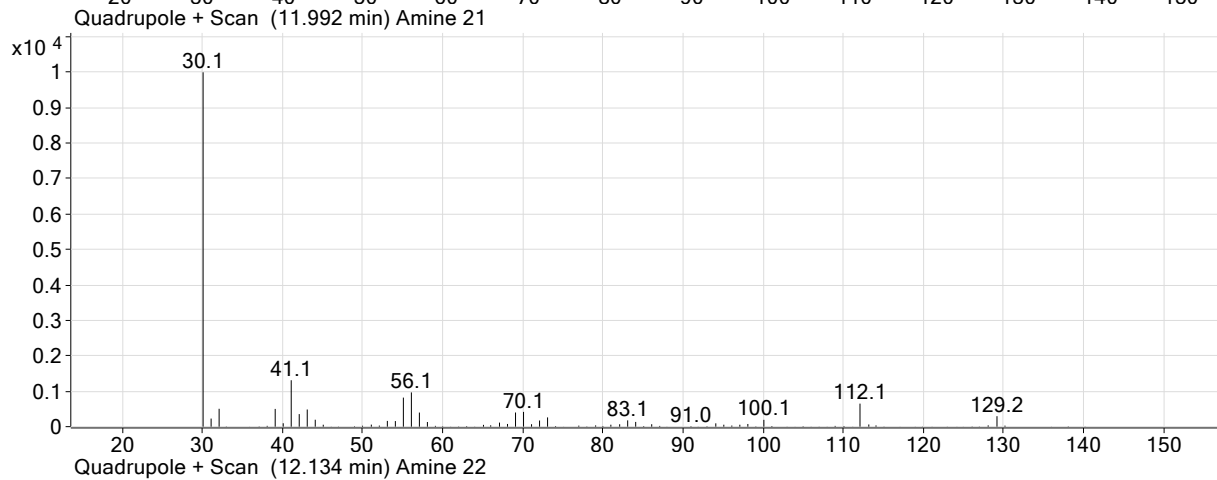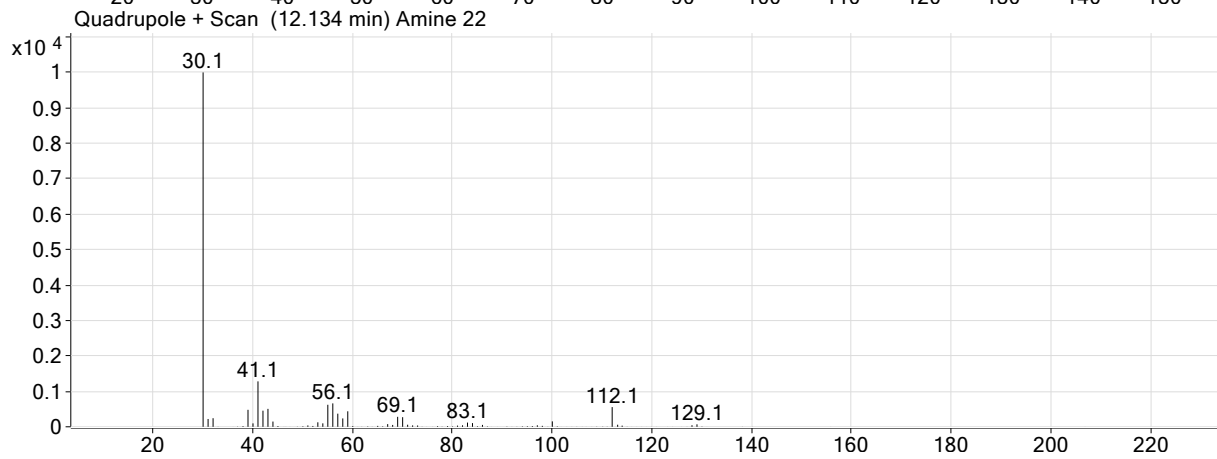

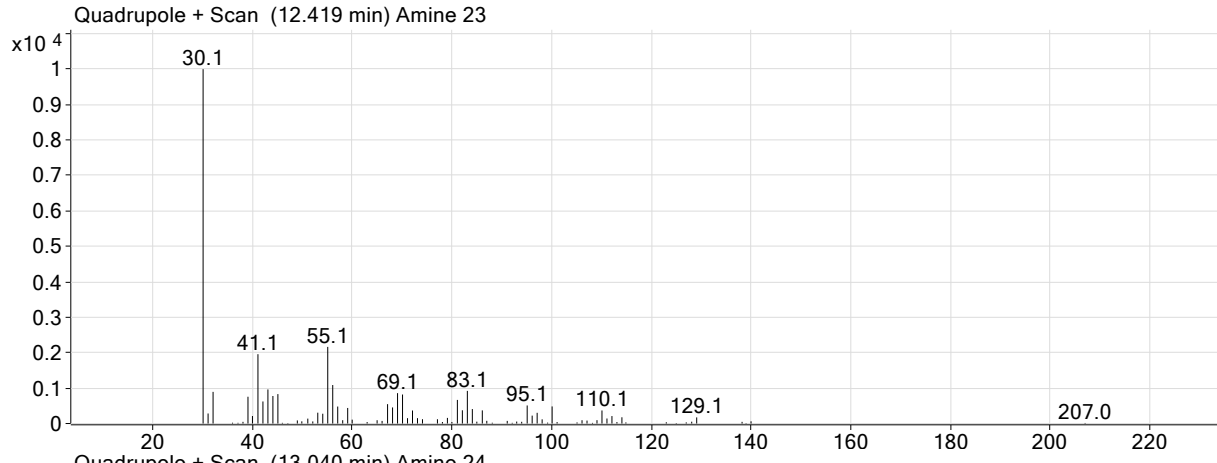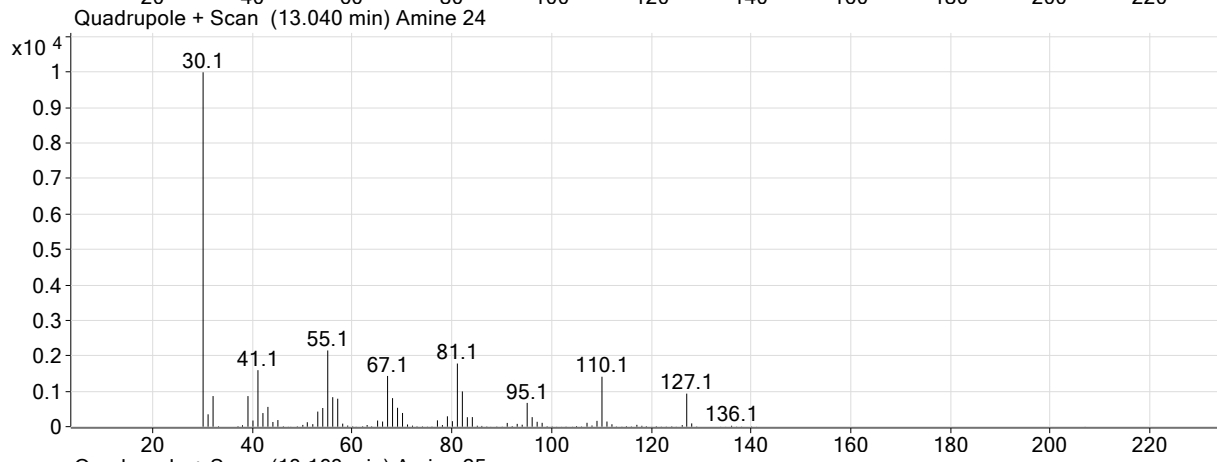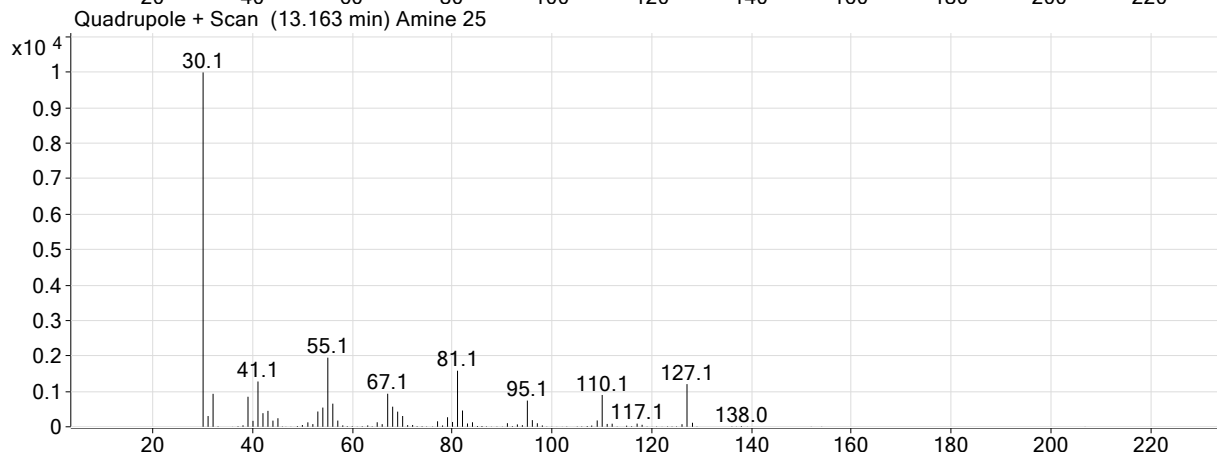

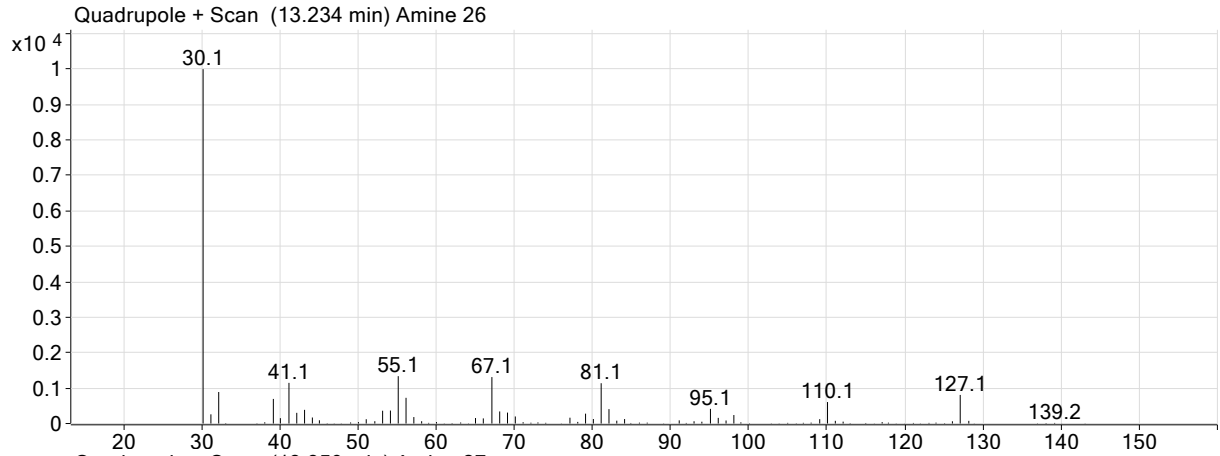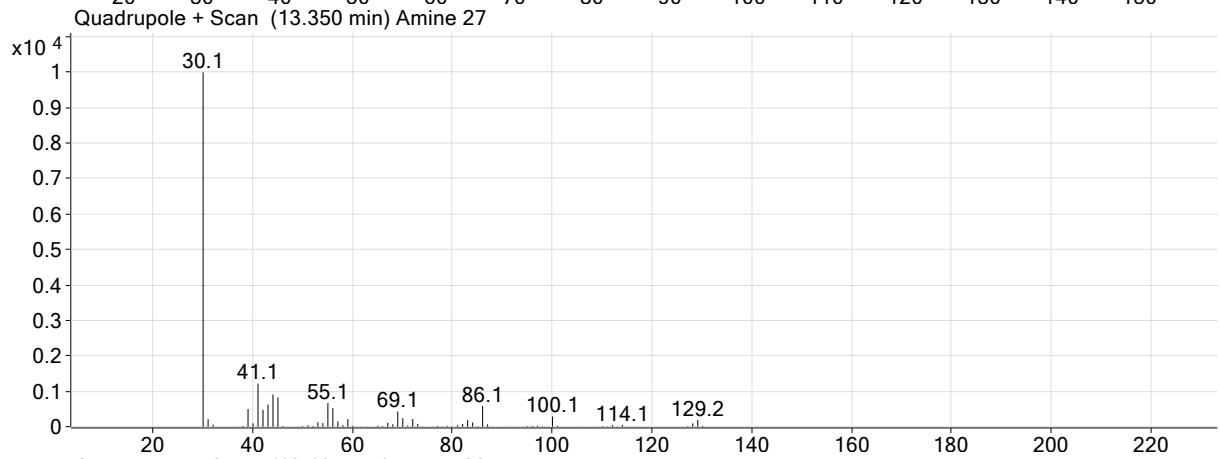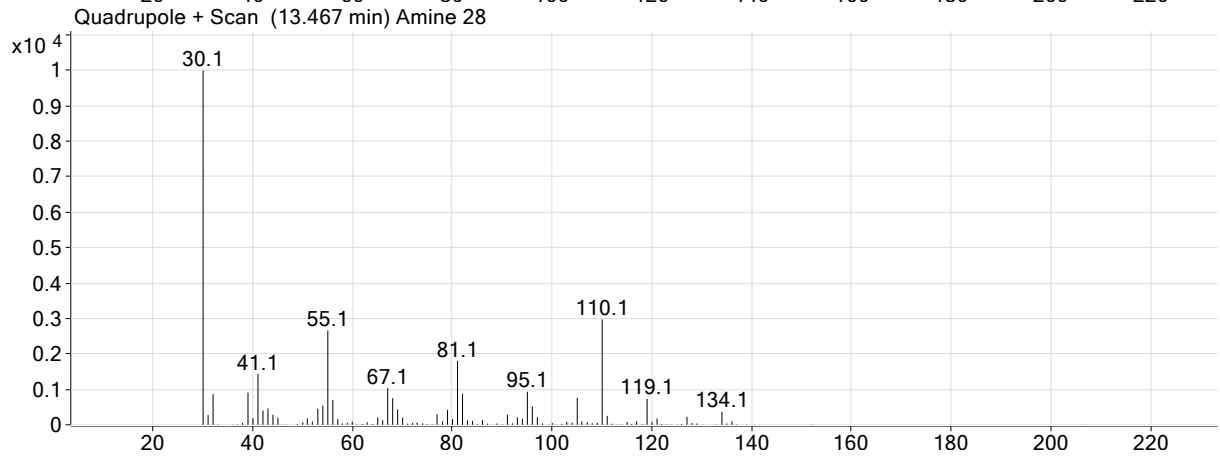

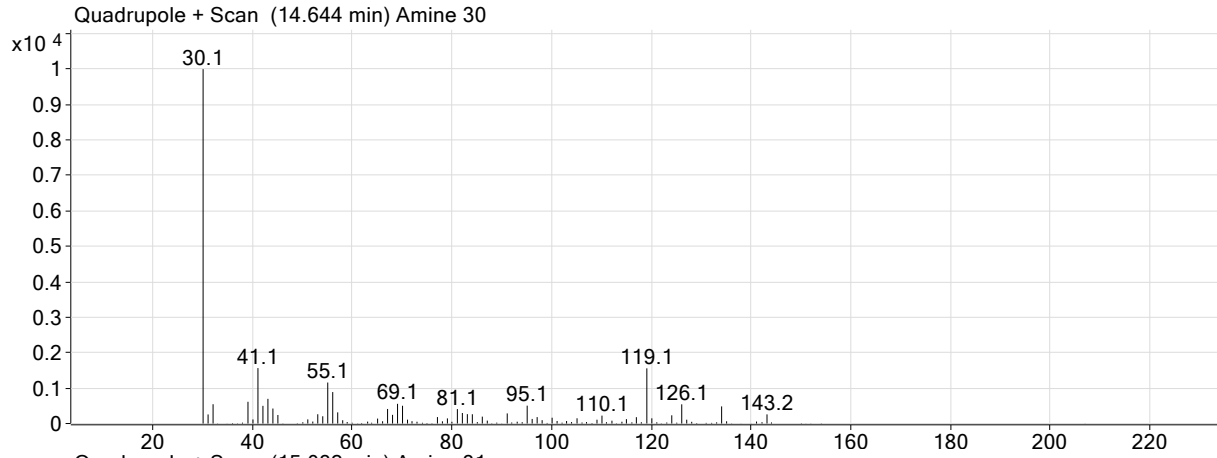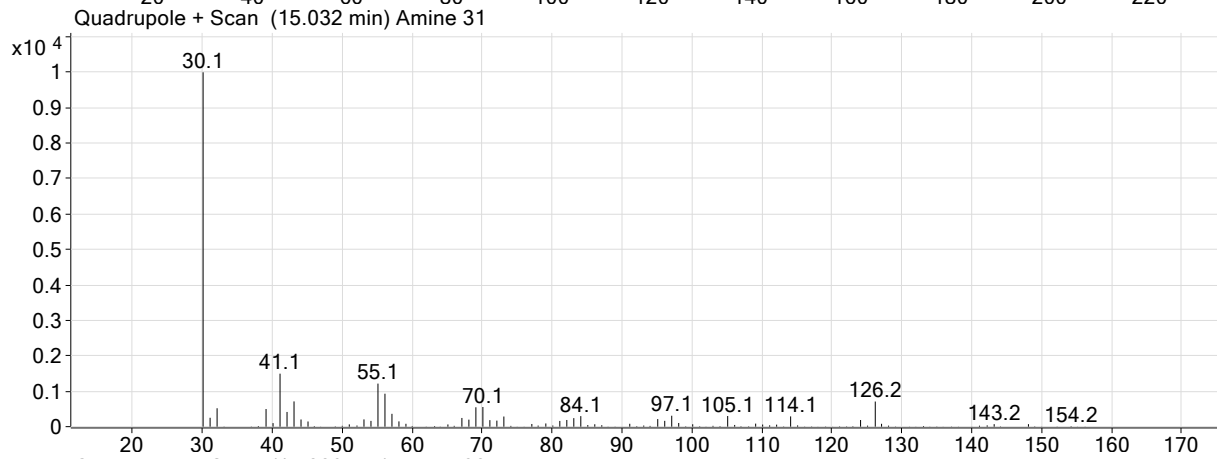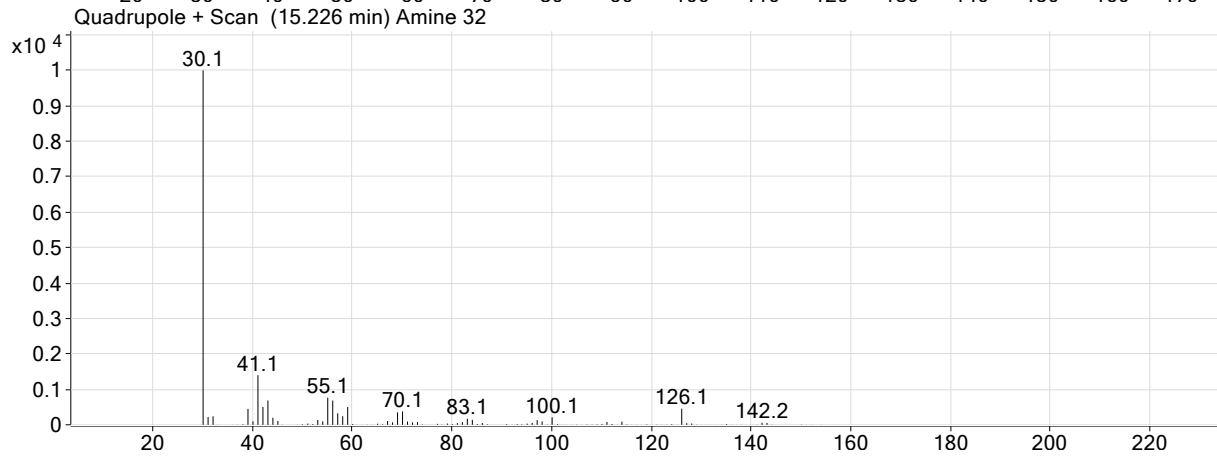

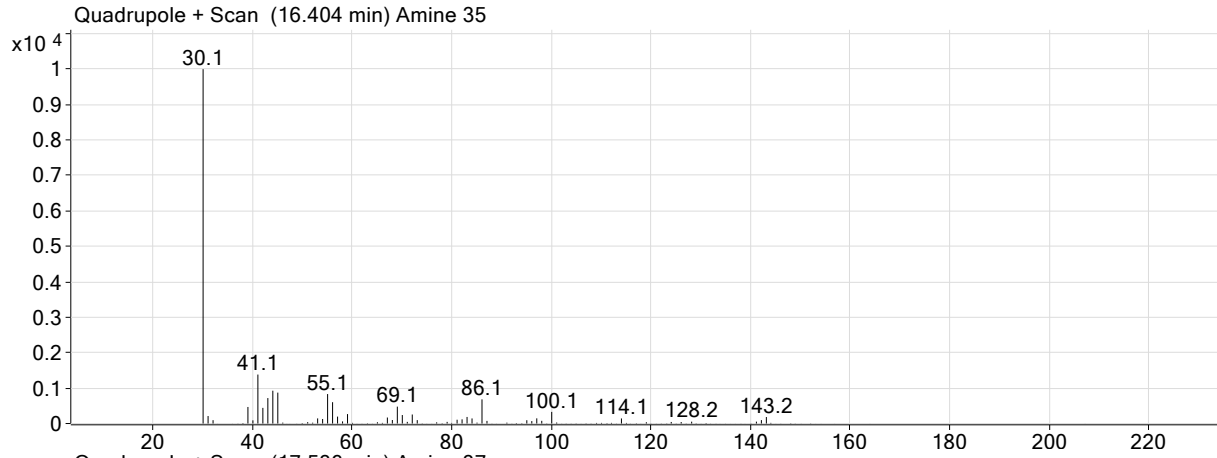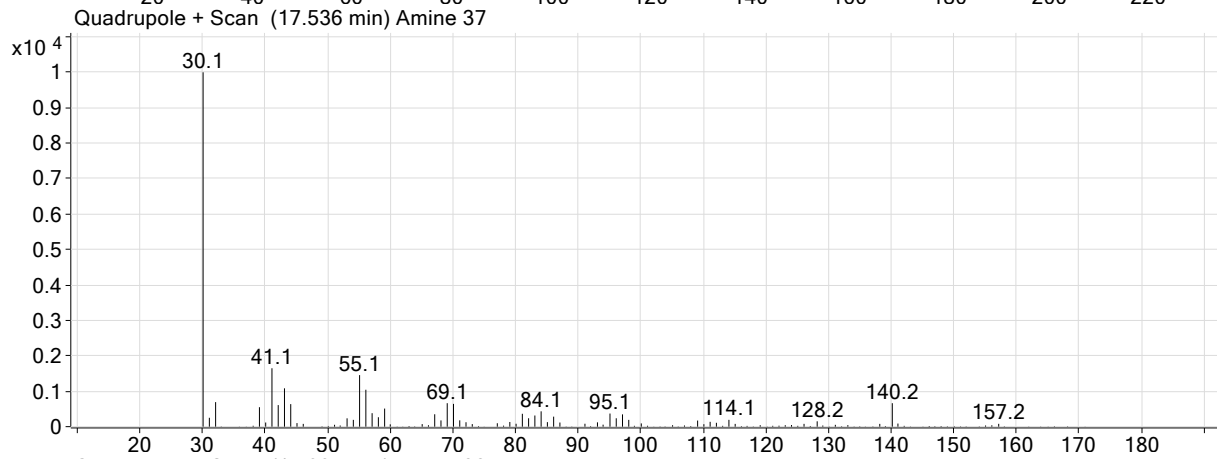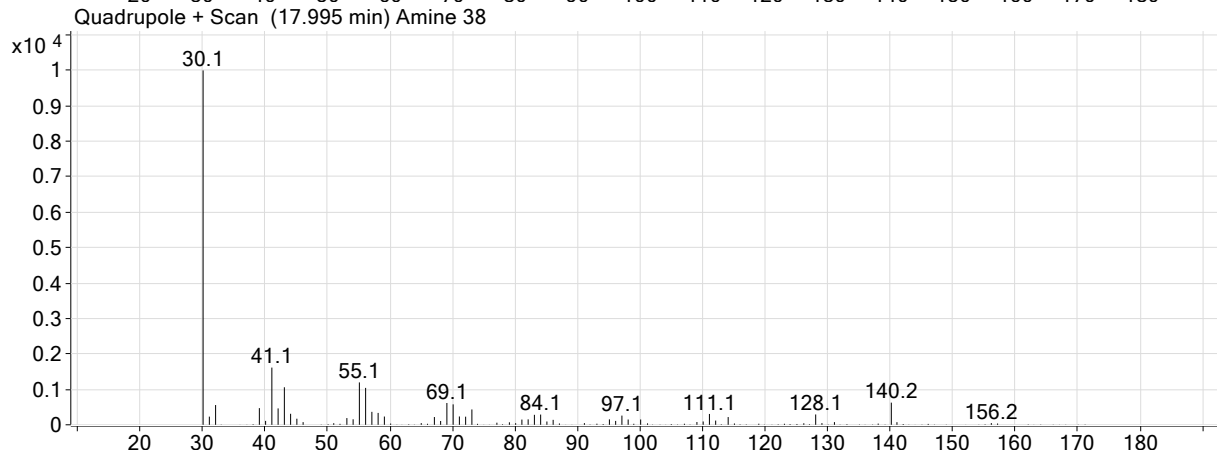

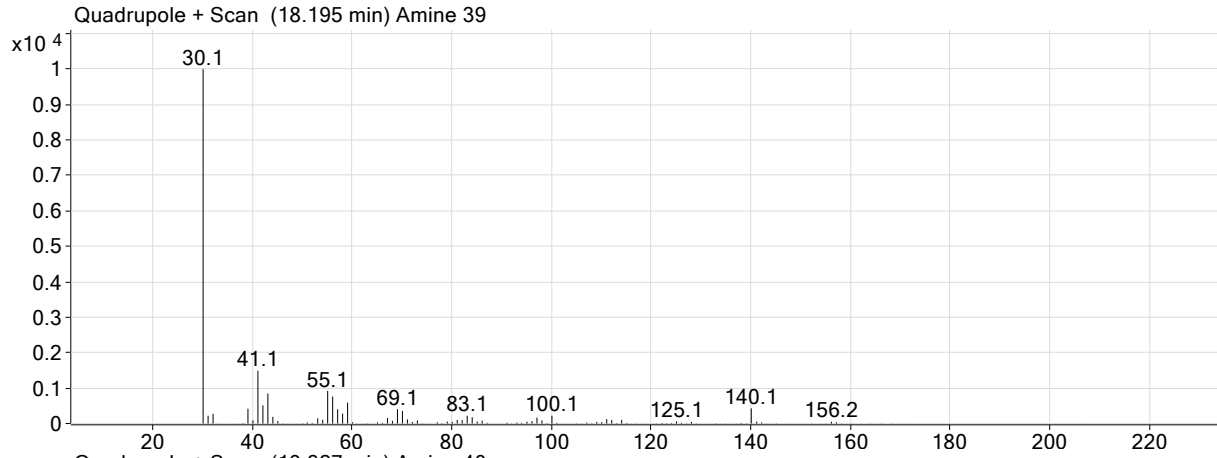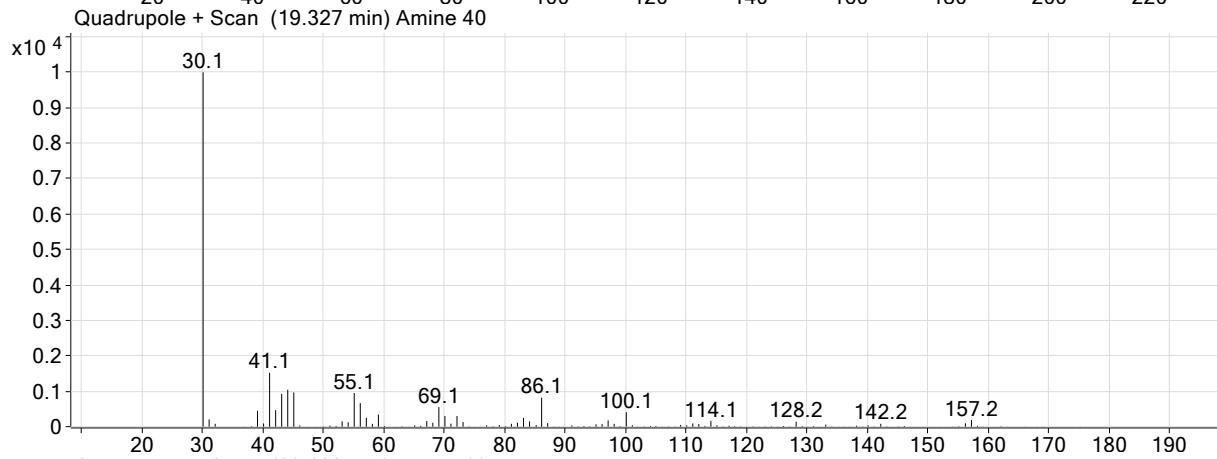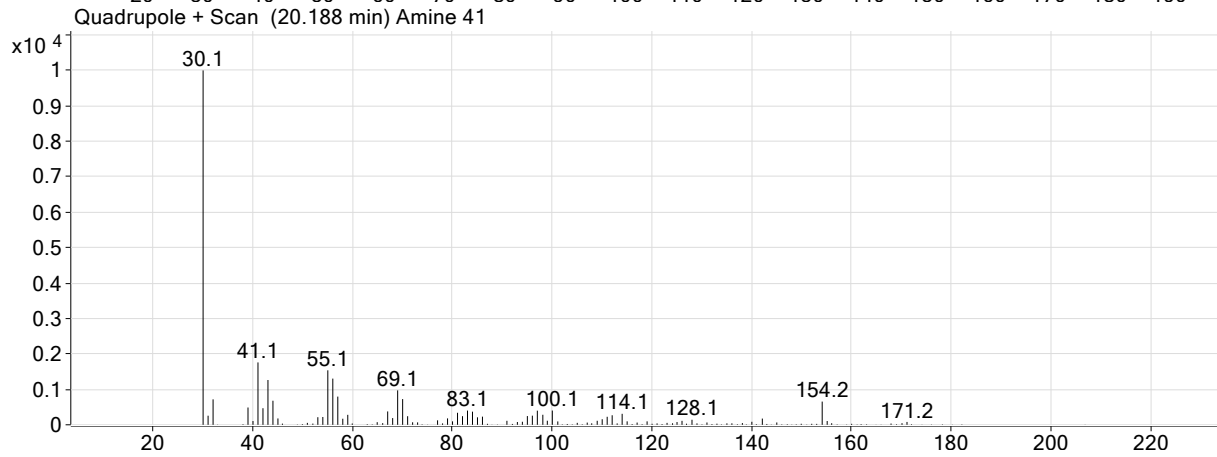



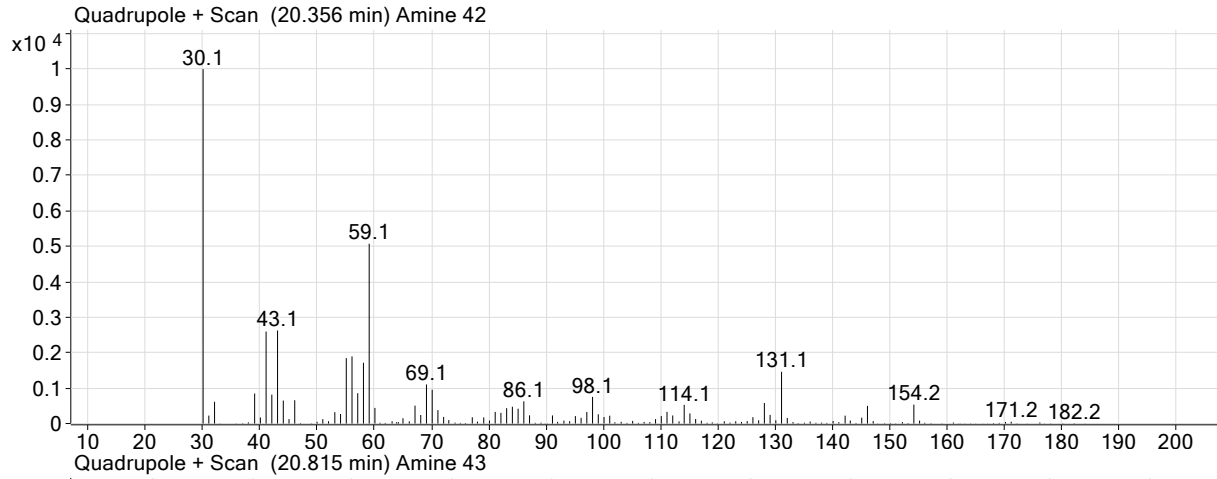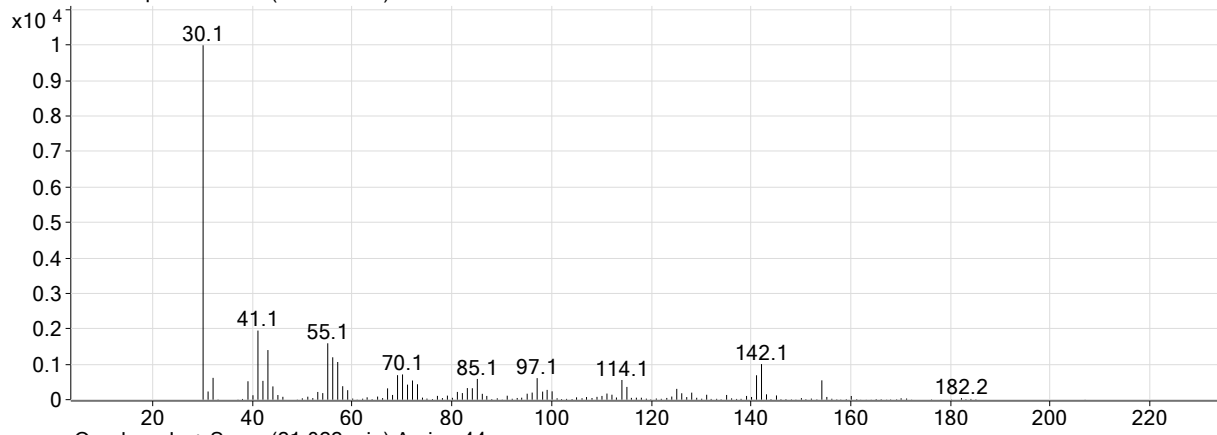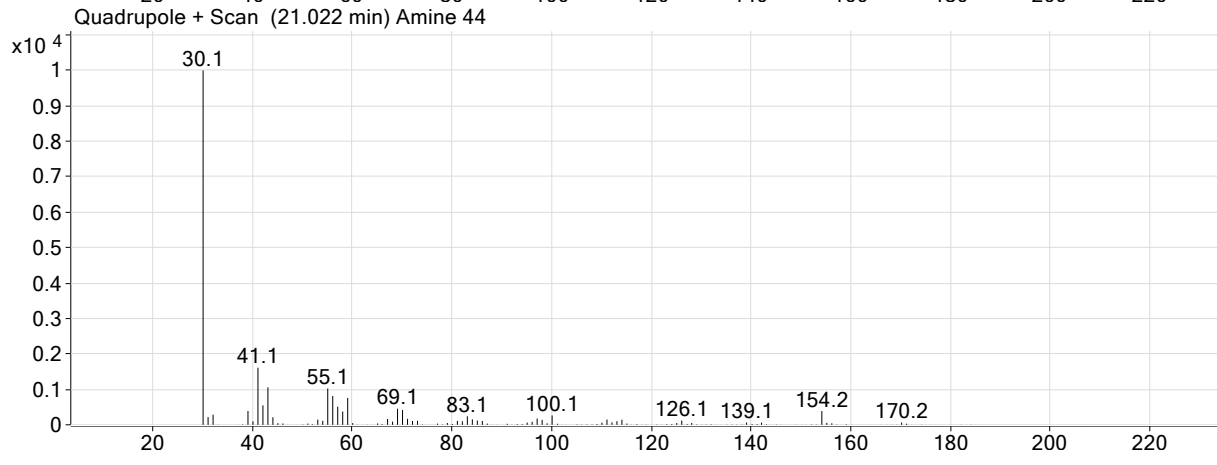

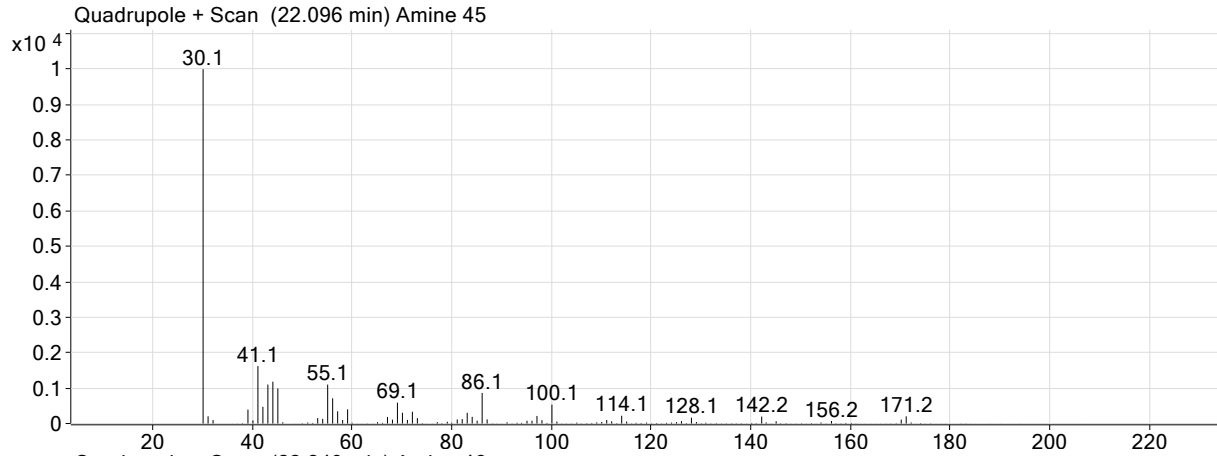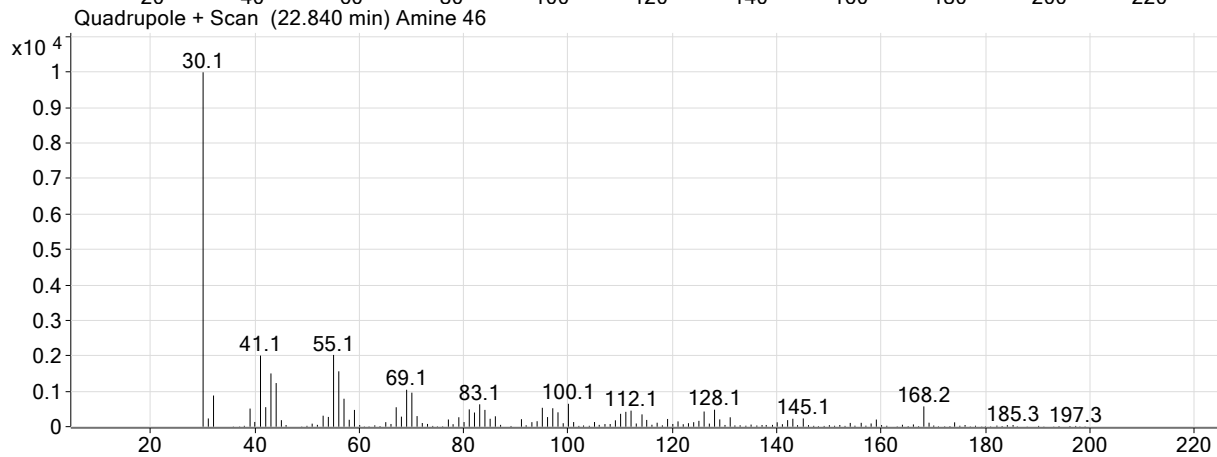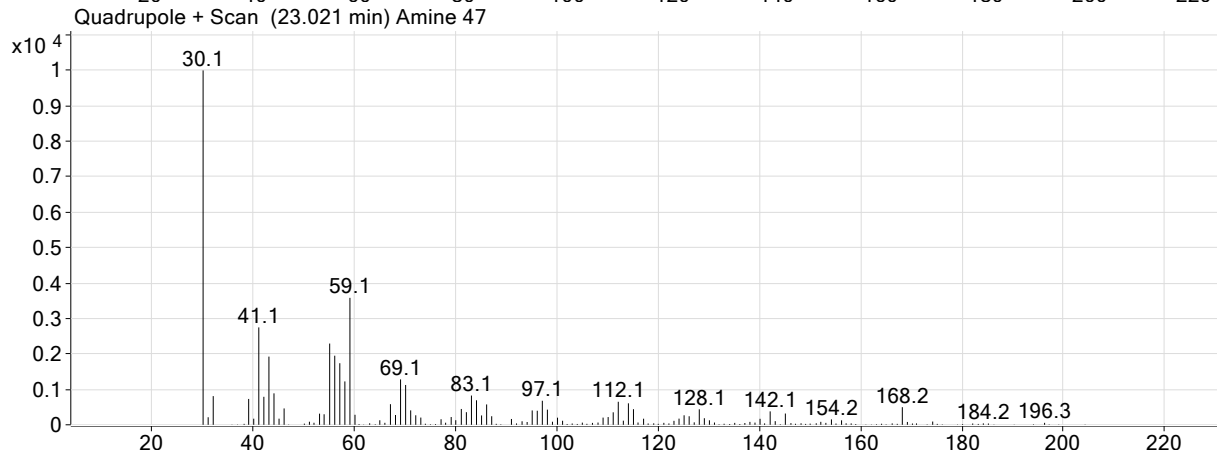

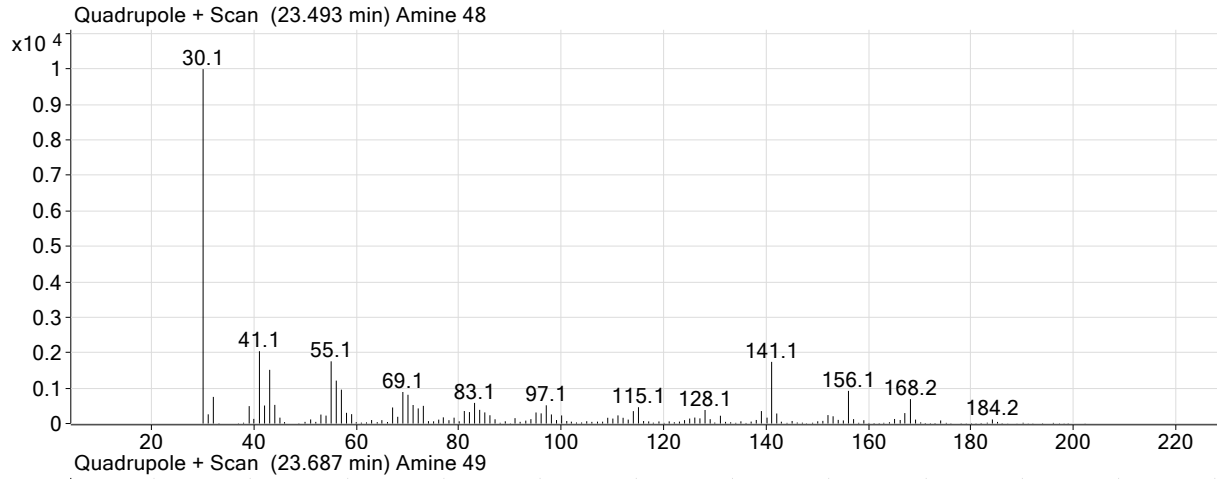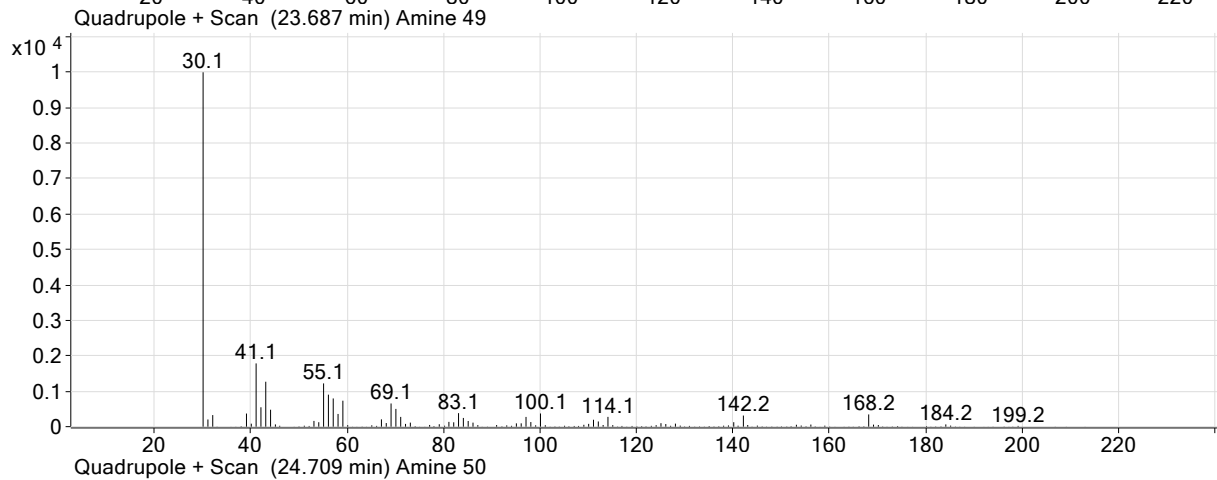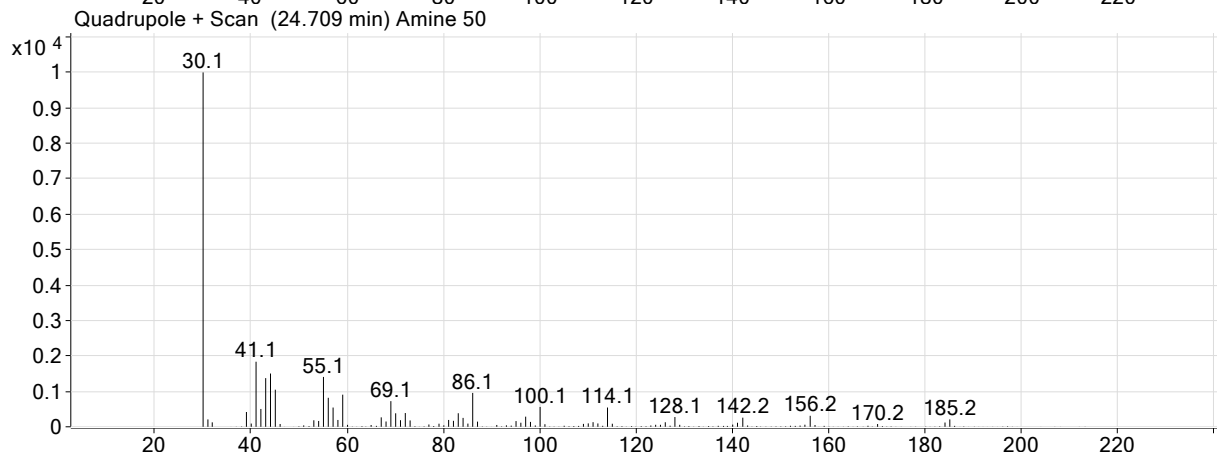

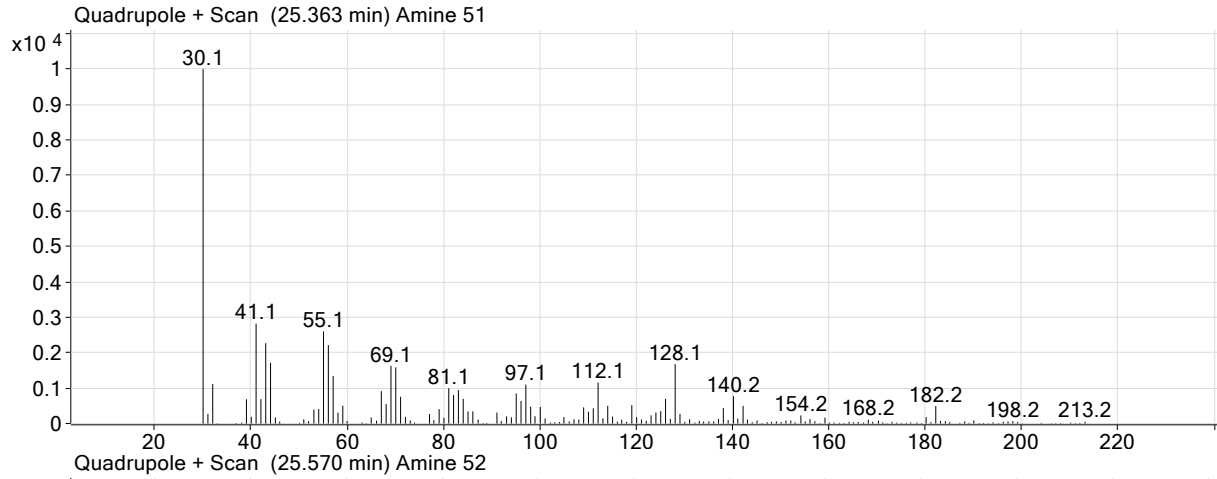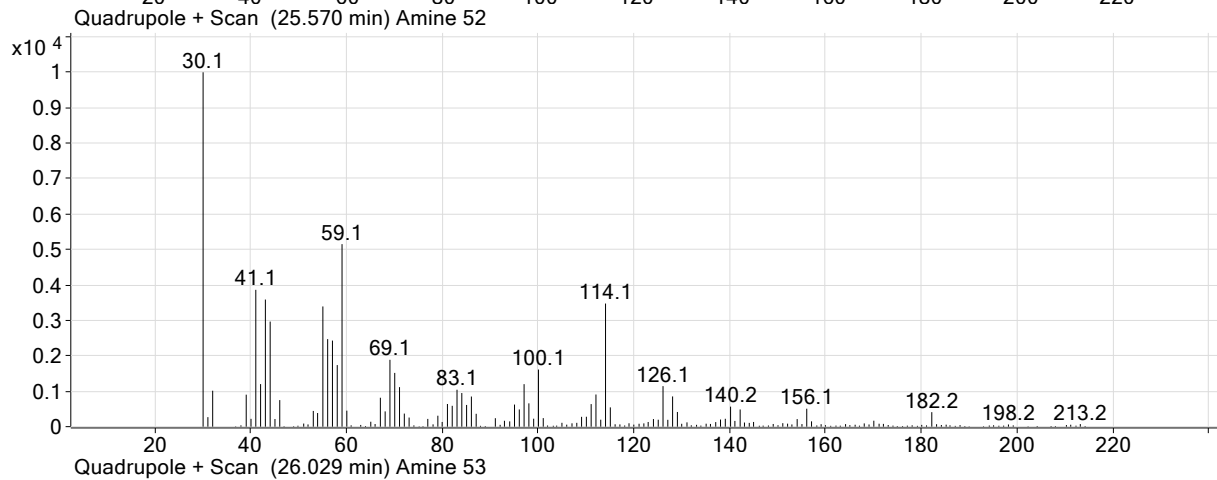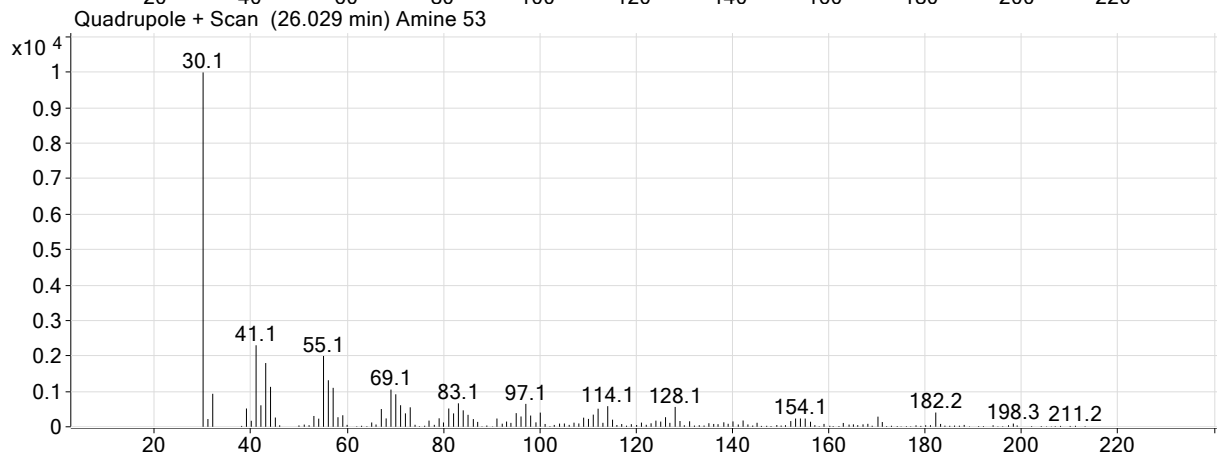

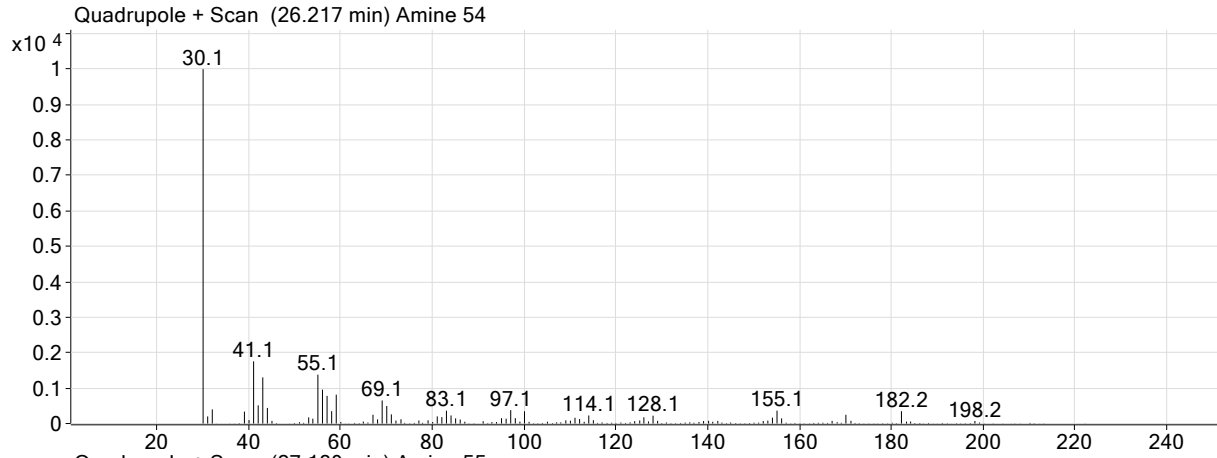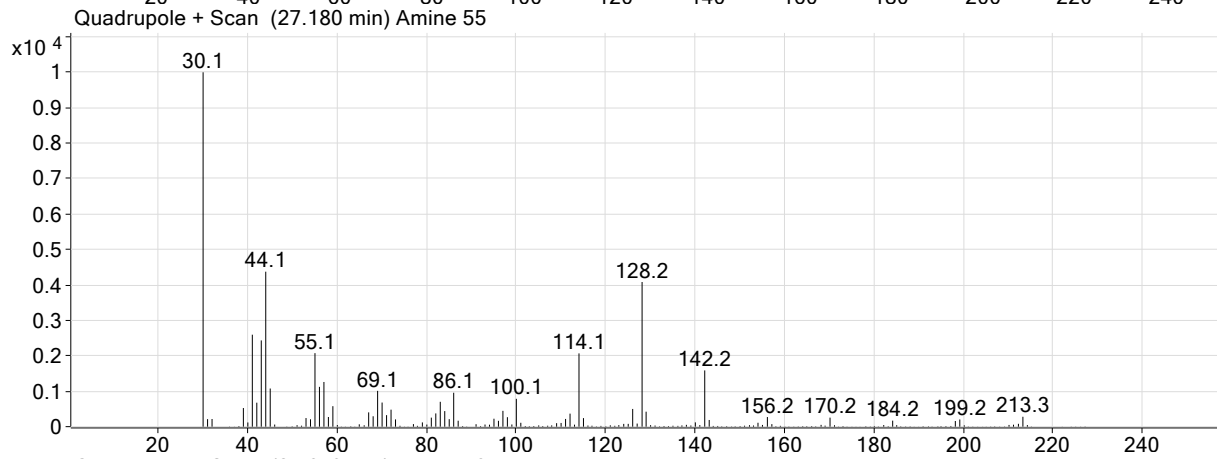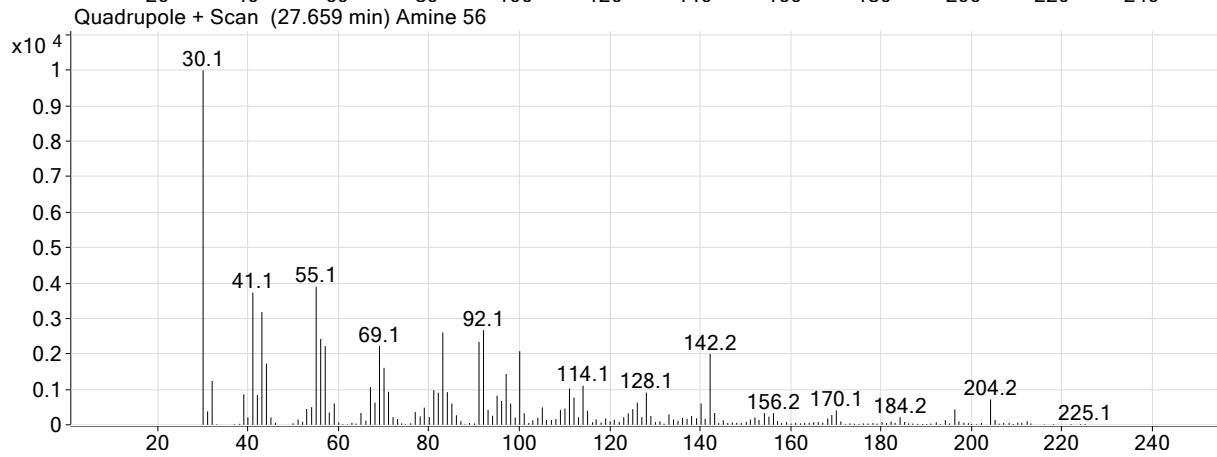

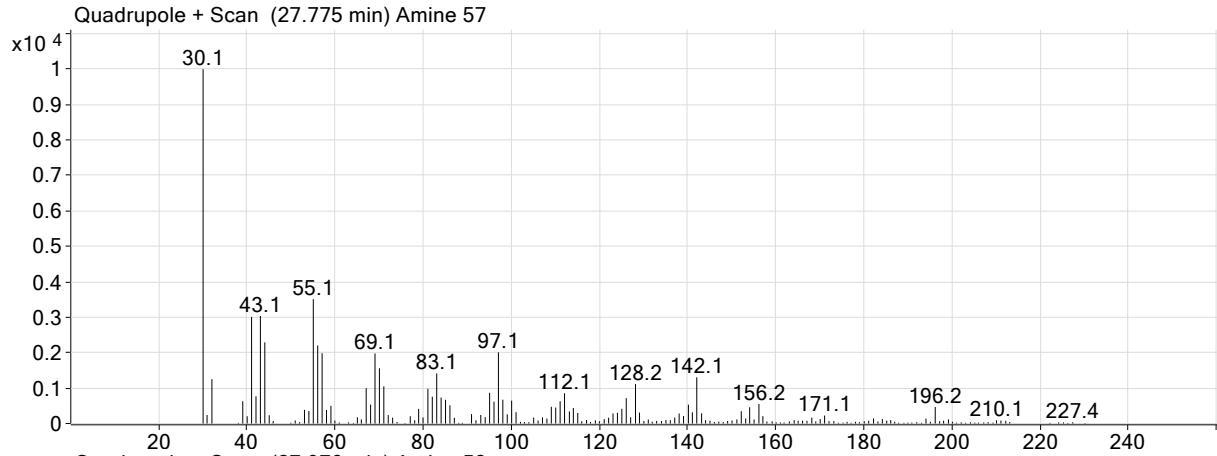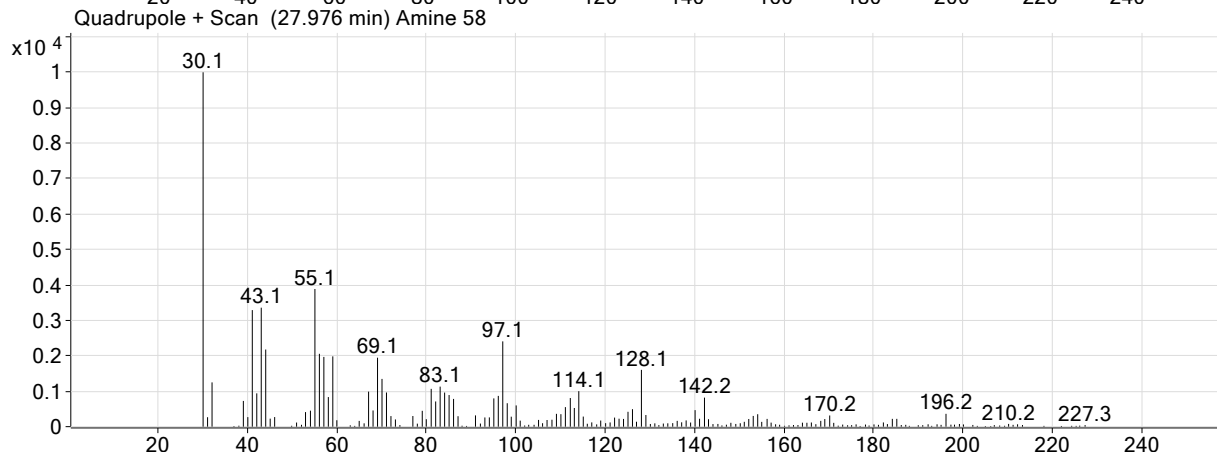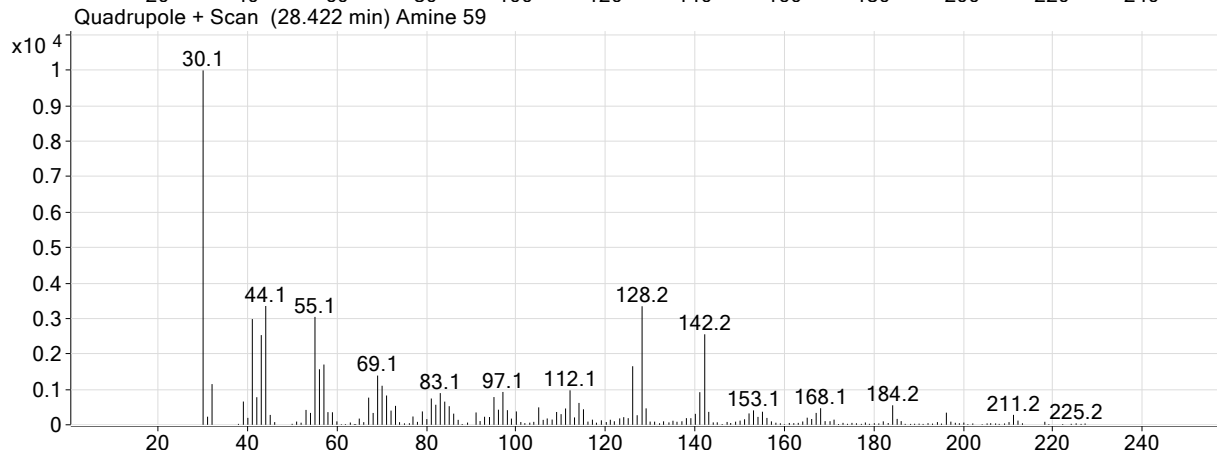

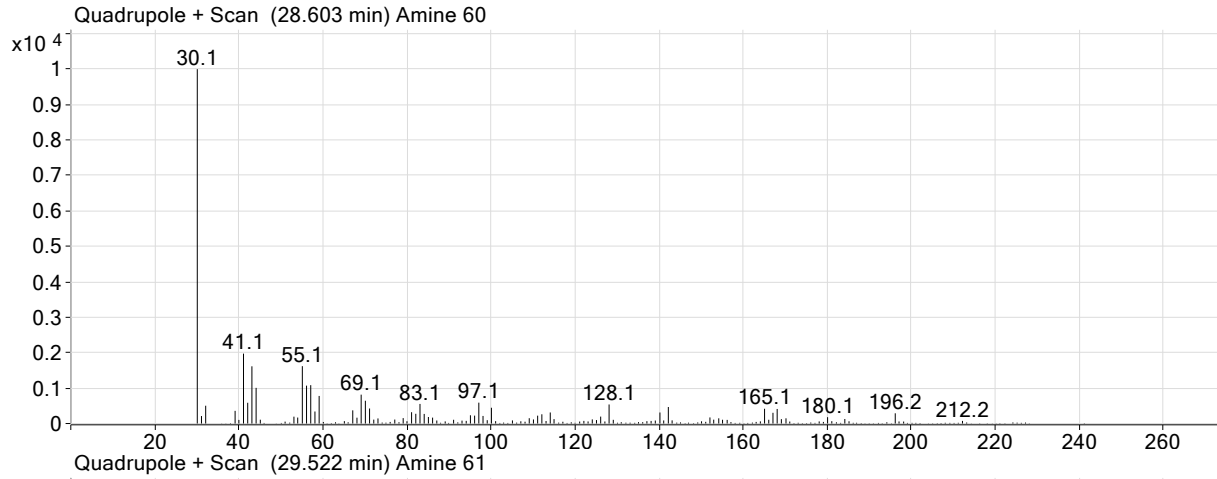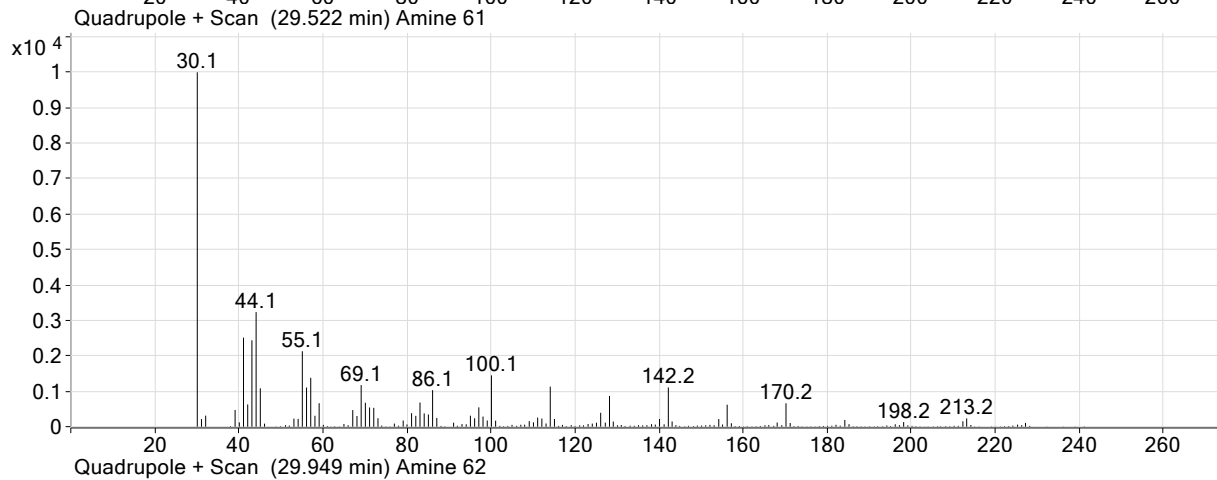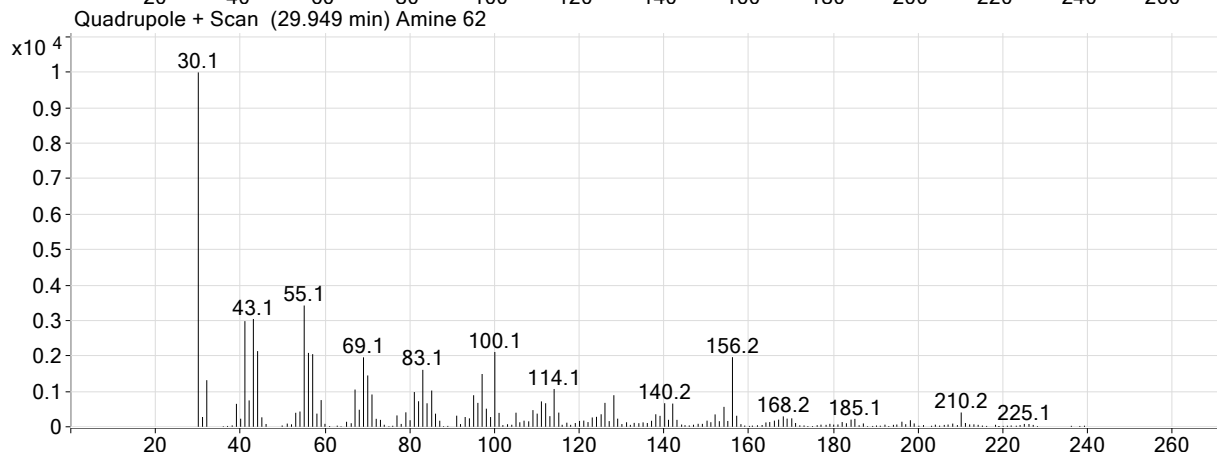

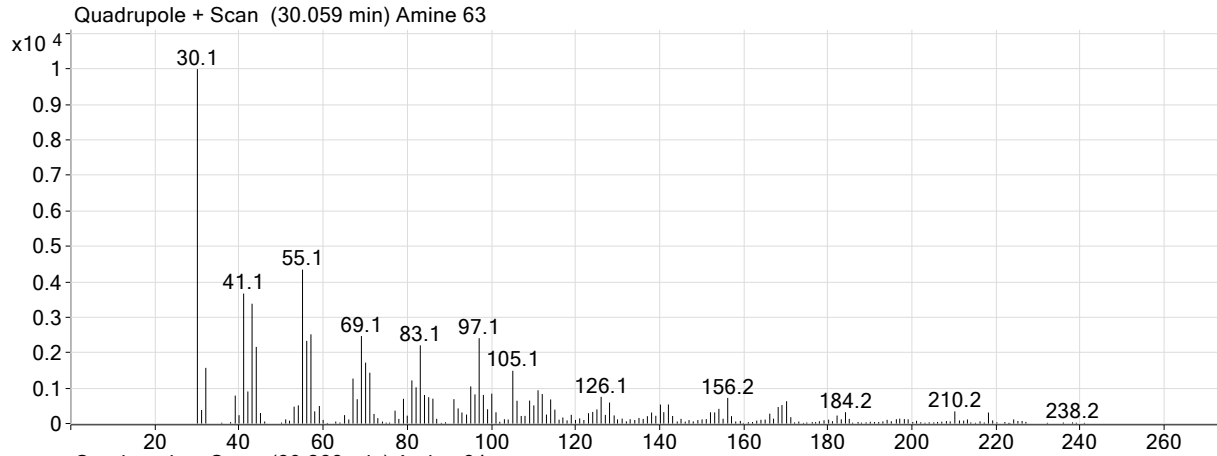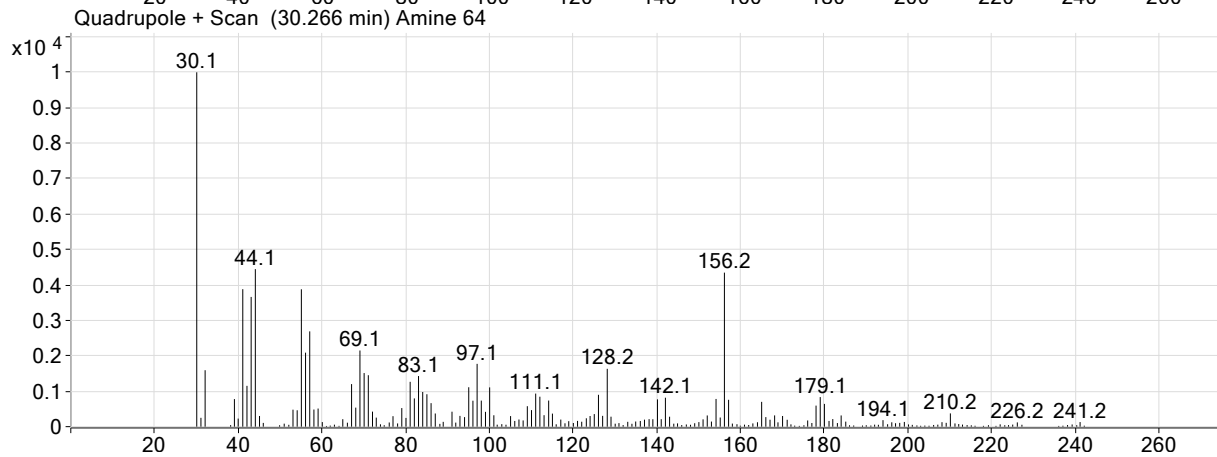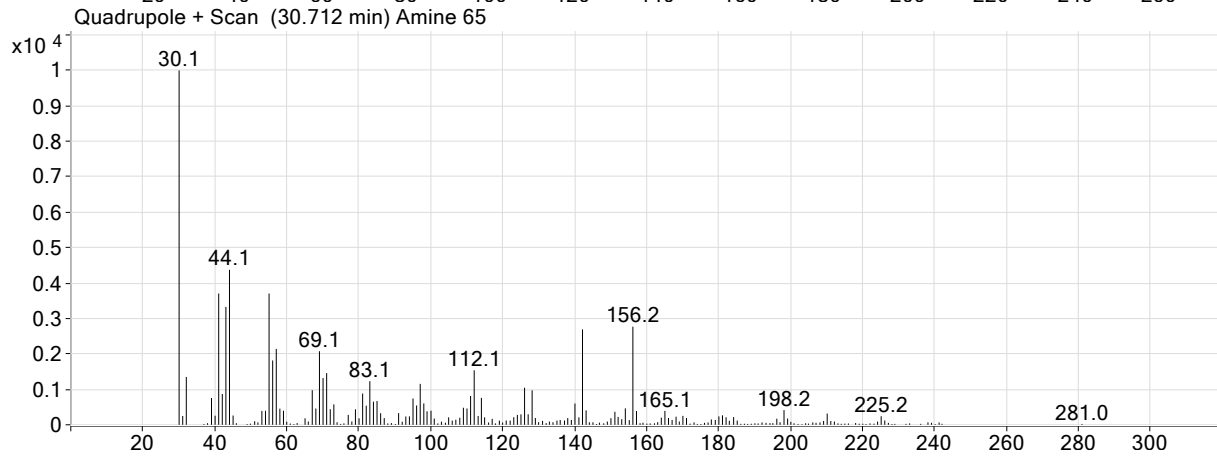



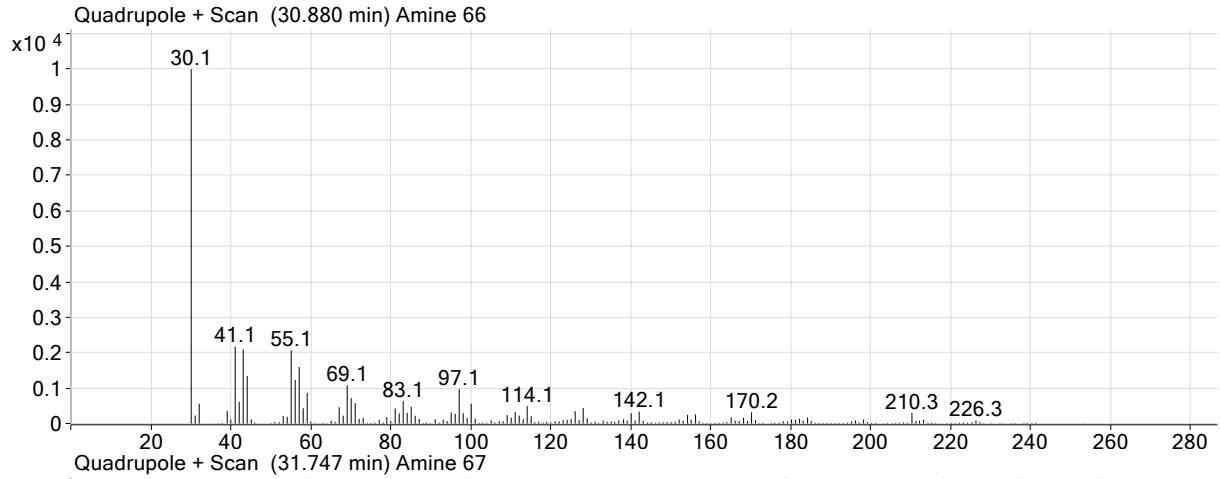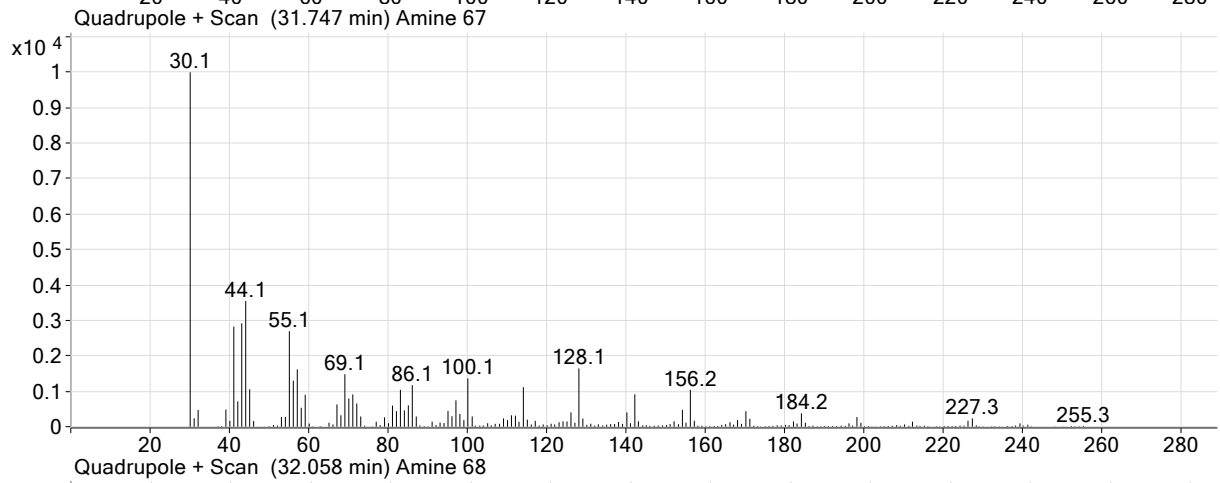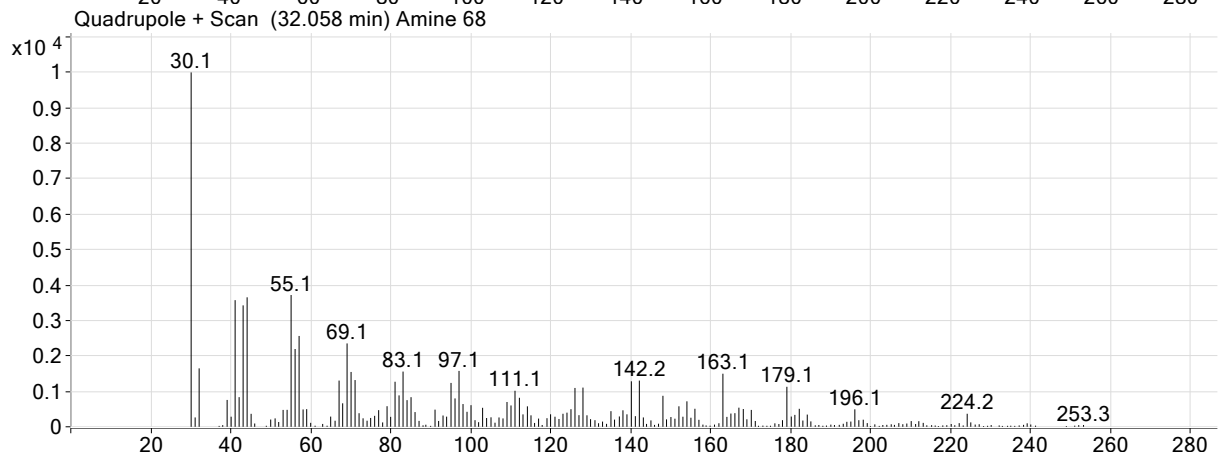

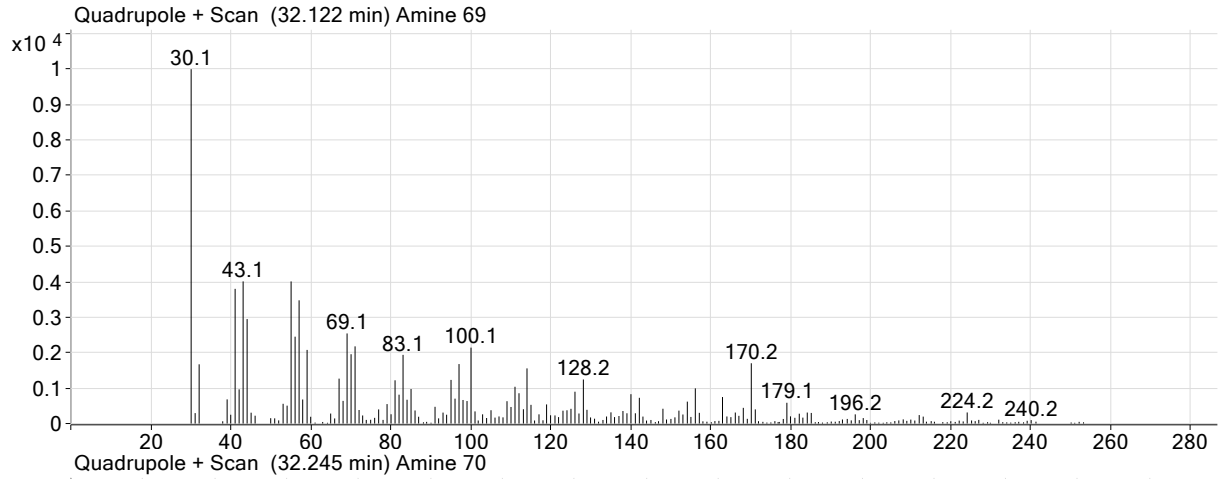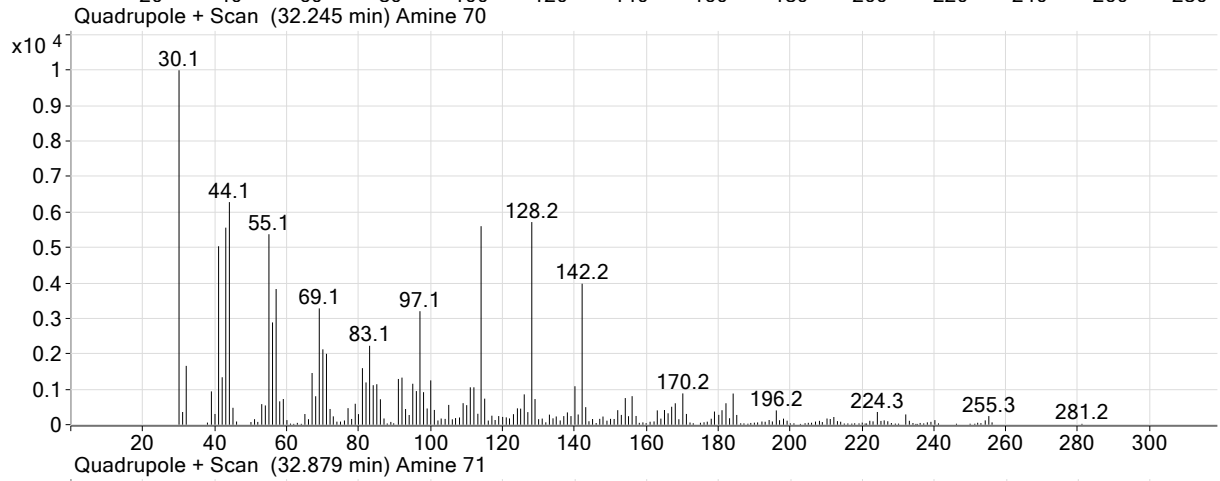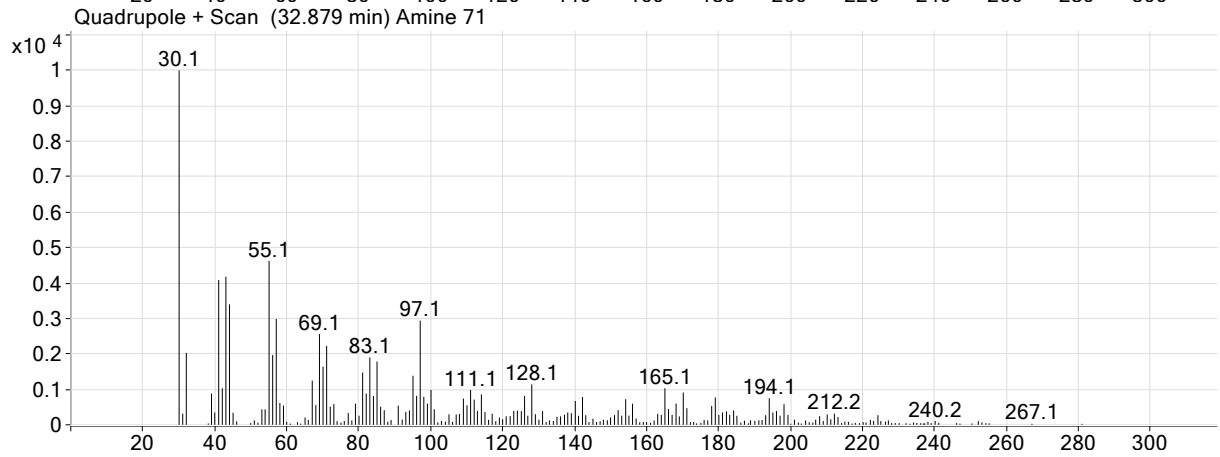

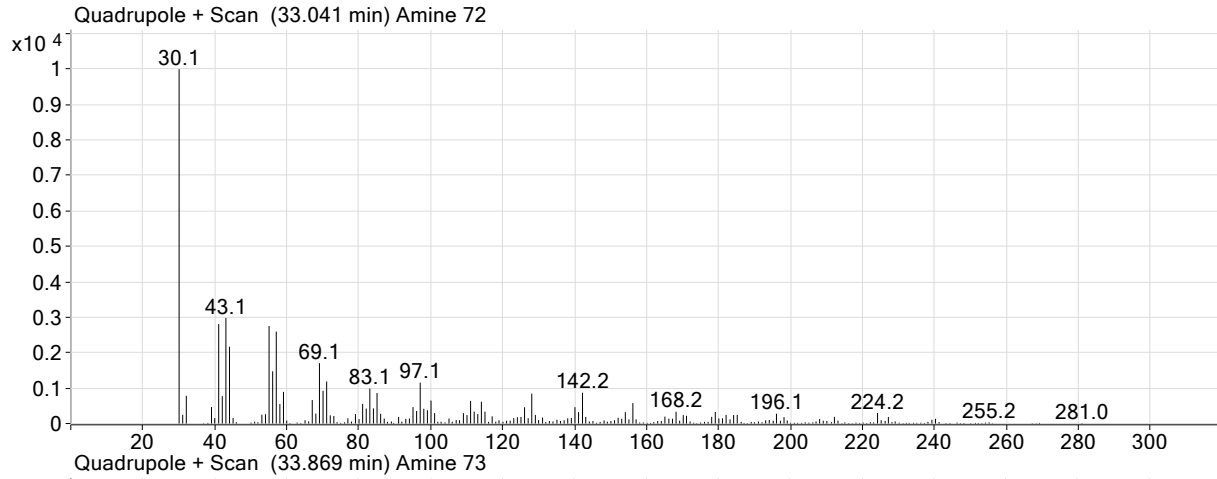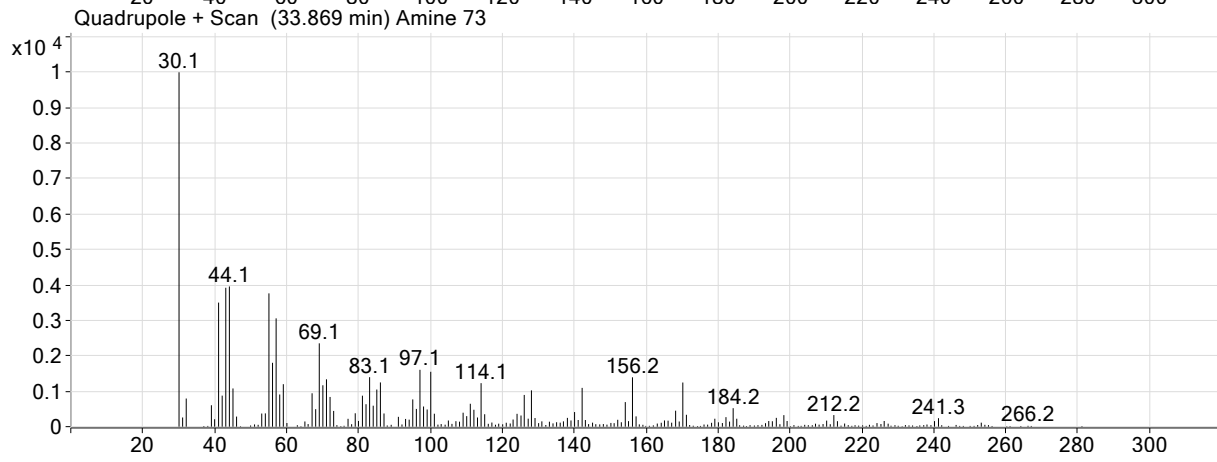

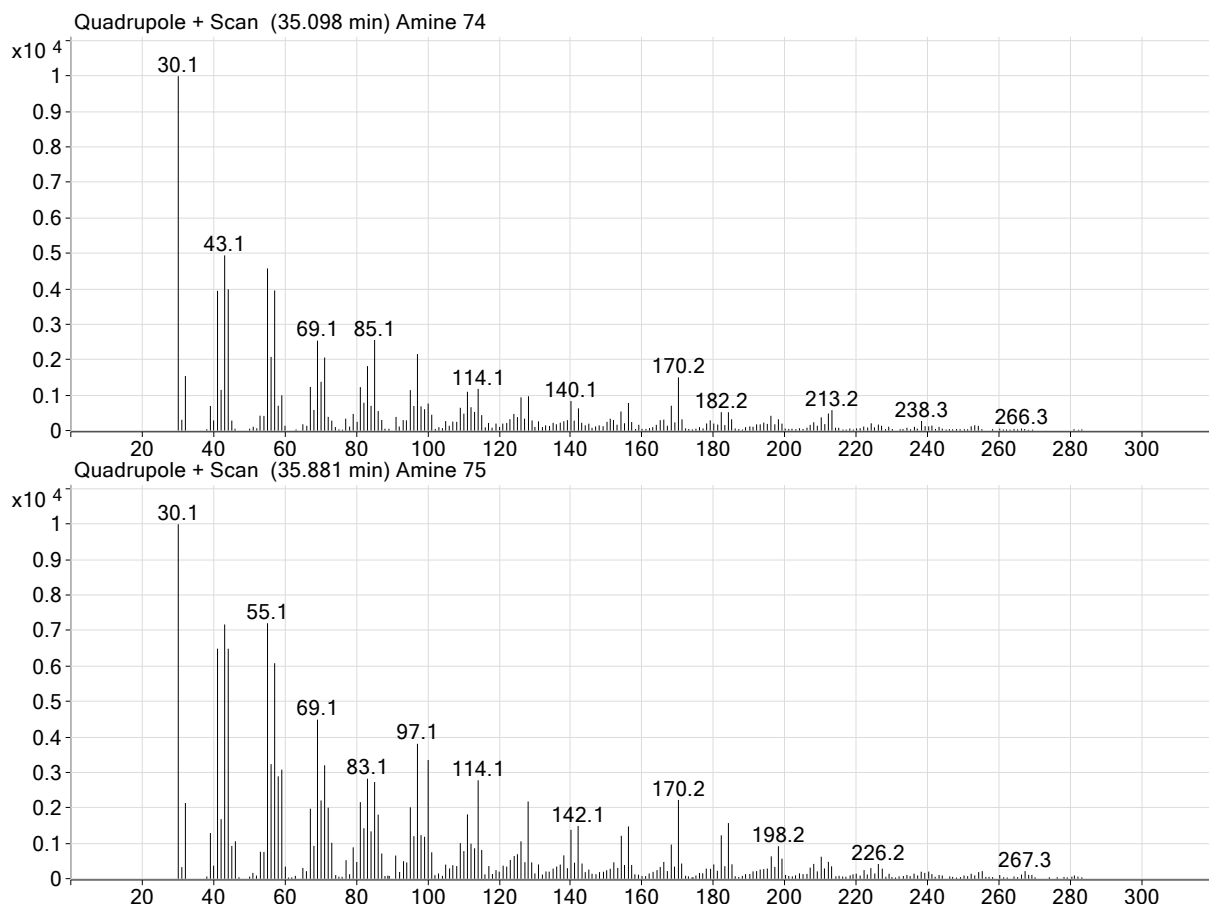

**Figure S5.** Library matching and reference mass spectra for the gas chromatography mass spectrometry with a polyarc flame ionization detection (GC-MS/Polyarc-FID) of the aminated oil generated from post-consumer recycled (PCR) HDPE by pyrolysis, hydroformylation, reductive amination, and rotary evaporation.

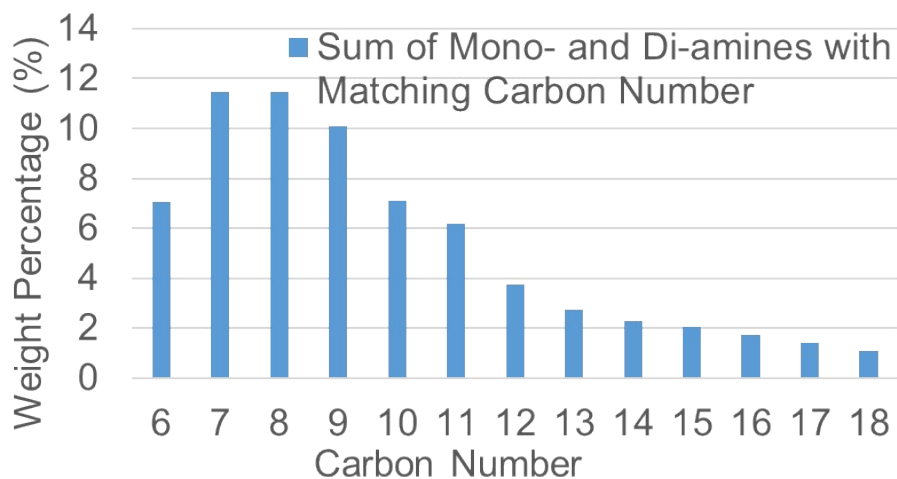

**Figure S6.** Theoretical carbon distribution of the sum of monoamines and diamines in the aminated oil based on the mono- and di-olefins in the pyrolysis oil.

**Table S1.** Karl Fischer titration of the aminated oil after rotary evaporation. The measured 6.3 wt% H<sub>2</sub>O indicates a 9.4 wt% H<sub>2</sub>O in the aminated oil after excluding the weight of CH<sub>3</sub>OH.

|                 | H <sub>2</sub> O % |
|-----------------|--------------------|
| 1st measurement | 6.3                |
| 2nd measurement | 6.3                |
| 3rd measurement | 6.4                |

**Table S2.** Detailed information on the high-resolution liquid chromatography mass spectrometry (HRLC-MS) chromatogram of the aminated oil.

| Adducts | Formula  | Mass Error (ppm) | Isotope Similarity | m/z [M+H] | Retention time (min) | Manually Centered | m/z minus H |
|---------|----------|------------------|--------------------|-----------|----------------------|-------------------|-------------|
| M+H     | C8H17N   | 4.92             | 99.2               | 128.1440  | 15.298               |                   | 127.1362    |
| M+H     | C8H17N   | 4.93             | 99.4               | 128.1440  | 16.617               |                   | 127.1362    |
| M+H     | C8H17N   | 4.94             | 98.2               | 128.1440  | 12.356               |                   | 127.1362    |
| M+H     | C8H19N   | 4.00             | 98.5               | 130.1595  | 3.235                |                   | 129.1517    |
| M+H     | C9H19N   | 4.99             | 96.2               | 142.1597  | 3.185                |                   | 141.1519    |
| M+H     | C9H21N   | 2.80             | 98.1               | 144.1754  | 4.690                | Y                 | 143.1676    |
| M+H     | C9H21N   | 2.10             | 98.8               | 144.1755  | 5.597                | Y                 | 143.1677    |
| M+H     | C10H21N  | 4.31             | 98.5               | 156.1753  | 5.324                |                   | 155.1675    |
| M+H     | C10H21N  | 4.54             | 99.5               | 156.1754  | 5.955                |                   | 155.1676    |
| M+H     | C10H21N  | 4.55             | 99.1               | 156.1754  | 4.862                |                   | 155.1676    |
| M+H     | C10H21N  | 4.97             | 98.4               | 156.1754  | 4.605                |                   | 155.1676    |
| M+H     | C9H19NO  | 5.96             | 99.4               | 158.1549  | 13.092               |                   | 157.1471    |
| M+H     | C9H19NO  | 3.20             | 98.8               | 158.1550  | 12.150               | Y                 | 157.1472    |
| M+H     | C10H23N  | 3.70             | 98.5               | 158.1909  | 2.652                |                   | 157.1831    |
| M+H     | C10H23N  | 4.45             | 98.9               | 158.1910  | 7.308                |                   | 157.1832    |
| M+H     | C10H23N  | 4.54             | 99.1               | 158.1910  | 2.105                |                   | 157.1832    |
| M+H     | C10H23N  | 4.98             | 99.0               | 158.1911  | 7.085                |                   | 157.1833    |
| M+H     | C10H23N  | 1.90             | 99.8               | 158.1912  | 8.010                | Y                 | 157.1834    |
| M+H     | C10H23N  | 2.50             | 98.8               | 158.1913  | 6.674                | Y                 | 157.1835    |
| M+H     | C10H19NO | 4.37             | 89.1               | 170.1547  | 12.920               |                   | 169.1469    |
| M+H     | C11H23N  | 3.02             | 93.5               | 170.1908  | 2.088                |                   | 169.1830    |
| M+H     | C11H23N  | 3.30             | 93.7               | 170.1909  | 16.651               |                   | 169.1831    |
| M+H     | C11H23N  | 3.45             | 98.9               | 170.1909  | 7.736                |                   | 169.1831    |
| M+H     | C11H23N  | 3.56             | 98.2               | 170.1909  | 2.618                |                   | 169.1831    |
| M+H     | C11H23N  | 3.88             | 99.1               | 170.1910  | 7.052                |                   | 169.1832    |
| M+H     | C11H23N  | 3.91             | 98.6               | 170.1910  | 7.325                |                   | 169.1832    |
| M+H     | C11H23N  | 3.92             | 94.3               | 170.1910  | 8.334                |                   | 169.1832    |
| M+H     | C11H23N  | 3.96             | 94.3               | 170.1910  | 17.832               |                   | 169.1832    |

|     |           |      |       |          |        |   |          |
|-----|-----------|------|-------|----------|--------|---|----------|
| M+H | C11H23N   | 4.30 | 92.5  | 170.1911 | 15.386 |   | 169.1833 |
| M+H | C11H23N   | 4.44 | 99.0  | 170.1911 | 7.959  |   | 169.1833 |
| M+H | C10H21NO  | 4.35 | 97.8  | 172.1703 | 15.146 |   | 171.1625 |
| M+H | C10H21NO  | 4.74 | 97.5  | 172.1704 | 14.614 |   | 171.1626 |
| M+H | C10H21NO  | 4.94 | 99.9  | 172.1704 | 15.950 |   | 171.1626 |
| M+H | C11H25N   | 3.47 | 99.1  | 172.2066 | 4.312  |   | 171.1988 |
| M+H | C11H25N   | 4.27 | 99.2  | 172.2067 | 3.886  |   | 171.1989 |
| M+H | C11H25N   | 4.48 | 99.6  | 172.2067 | 4.656  |   | 171.1989 |
| M+H | C11H25N   | 3.50 | 99.7  | 172.2071 | 10.132 | Y | 171.1993 |
| M+H | C11H25N   | 4.60 | 99.2  | 172.2073 | 9.309  | Y | 171.1995 |
| M+H | C9H20N2O  | 3.88 | 96.5  | 173.1655 | 11.843 |   | 172.1577 |
| M+H | C12H21N   | 2.20 | 94.2  | 180.1752 | 1.575  | Y | 179.1674 |
| M+H | C12H23N   | 4.11 | 94.4  | 182.1911 | 2.449  |   | 181.1833 |
| M+H | C12H23N   | 1.10 | 98.8  | 182.1911 | 7.274  | Y | 181.1833 |
| M+H | C12H23N   | 1.10 | 99.1  | 182.1911 | 7.821  | Y | 181.1833 |
| M+H | C12H23N   | 2.20 | 97.0  | 182.1913 | 2.601  |   | 181.1835 |
| M+H | C11H21NO  | 0.00 | 93.7  | 184.1701 | 15.487 | Y | 183.1623 |
| M+H | C11H21NO  | 3.80 | 97.3  | 184.1708 | 15.794 | Y | 183.1630 |
| M+H | C12H25N   | 4.85 | 94.8  | 184.2069 | 4.929  |   | 183.1991 |
| M+H | C12H25N   | 2.20 | 98.2  | 184.2069 | 3.748  | Y | 183.1991 |
| M+H | C12H25N   | 1.60 | 96.6  | 184.2069 | 4.433  | Y | 183.1991 |
| M+H | C12H25N   | 1.60 | 97.5  | 184.2069 | 4.177  | Y | 183.1991 |
| M+H | C12H25N   | 2.70 | 98.8  | 184.2070 | 3.954  | Y | 183.1992 |
| M+H | C12H25N   | 3.30 | 98.6  | 184.2071 | 9.583  | Y | 183.1993 |
| M+H | C12H25N   | 3.30 | 97.5  | 184.2071 | 10.062 | Y | 183.1993 |
| M+H | C12H25N   | 2.70 | 98.9  | 184.2071 | 4.605  | Y | 183.1993 |
| M+H | C11H23NO  | 3.20 | 97.8  | 186.1864 | 17.799 | Y | 185.1786 |
| M+H | C11H23NO  | 4.30 | 100.0 | 186.1868 | 18.517 | Y | 185.1790 |
| M+H | C12H27N   | 2.70 | 98.4  | 186.2226 | 5.563  | Y | 185.2148 |
| M+H | C12H27N   | 3.20 | 99.5  | 186.2228 | 11.259 | Y | 185.2150 |
| M+H | C12H27N   | 4.30 | 99.6  | 186.2230 | 6.299  |   | 185.2152 |
| M+H | C12H27N   | 4.30 | 99.5  | 186.2230 | 6.657  |   | 185.2152 |
| M+H | C12H27N   | 4.30 | 99.3  | 186.2230 | 7.035  | Y | 185.2152 |
| M+H | C12H27N   | 4.80 | 99.7  | 186.2231 | 5.989  | Y | 185.2153 |
| M+H | C12H27N   | 3.80 | 99.6  | 186.2237 | 11.995 | Y | 185.2159 |
| M+H | C10H22N2O | 5.72 | 98.3  | 187.1816 | 14.512 |   | 186.1738 |
| M+H | C11H25NO  | 4.59 | 98.6  | 188.2018 | 3.131  |   | 187.1940 |
| M+H | C11H25NO  | 4.30 | 98.0  | 188.2019 | 2.892  | Y | 187.1941 |
| M+H | C11H25NO  | 3.70 | 98.8  | 188.2021 | 3.441  | Y | 187.1943 |
| M+H | C13H18O   | 3.19 | 95.0  | 191.1436 | 23.650 |   | 190.1358 |
| M+H | C13H23N   | 3.52 | 97.9  | 194.1910 | 2.156  |   | 193.1832 |
| M+H | C13H23N   | 3.70 | 96.2  | 194.1910 | 2.824  |   | 193.1832 |
| M+H | C13H25N   | 2.49 | 98.6  | 196.2065 | 4.808  |   | 195.1987 |

|     |          |      |      |          |        |   |          |
|-----|----------|------|------|----------|--------|---|----------|
| M+H | C13H25N  | 2.54 | 96.9 | 196.2065 | 4.143  |   | 195.1987 |
| M+H | C13H25N  | 2.71 | 92.8 | 196.2065 | 3.475  |   | 195.1987 |
| M+H | C13H25N  | 2.92 | 94.1 | 196.2065 | 4.366  |   | 195.1987 |
| M+H | C13H25N  | 3.01 | 96.7 | 196.2066 | 9.636  |   | 195.1988 |
| M+H | C13H25N  | 3.21 | 97.1 | 196.2066 | 3.920  |   | 195.1988 |
| M+H | C12H23NO | 3.38 | 78.1 | 198.1859 | 17.694 |   | 197.1781 |
| M+H | C12H23NO | 3.87 | 76.3 | 198.1860 | 18.379 |   | 197.1782 |
| M+H | C13H27N  | 3.12 | 95.8 | 198.2222 | 5.270  |   | 197.2144 |
| M+H | C13H27N  | 3.53 | 98.4 | 198.2223 | 11.209 |   | 197.2145 |
| M+H | C13H27N  | 3.64 | 96.0 | 198.2223 | 11.381 |   | 197.2145 |
| M+H | C13H27N  | 3.67 | 94.7 | 198.2223 | 11.911 |   | 197.2145 |
| M+H | C13H27N  | 3.74 | 97.0 | 198.2224 | 7.153  |   | 197.2146 |
| M+H | C13H27N  | 3.85 | 99.3 | 198.2224 | 5.732  |   | 197.2146 |
| M+H | C13H27N  | 4.12 | 98.7 | 198.2224 | 6.930  |   | 197.2146 |
| M+H | C13H27N  | 4.15 | 99.0 | 198.2224 | 6.367  |   | 197.2146 |
| M+H | C13H27N  | 4.18 | 98.4 | 198.2225 | 6.144  |   | 197.2147 |
| M+H | C13H27N  | 4.20 | 98.6 | 198.2225 | 6.572  |   | 197.2147 |
| M+H | C12H25NO | 3.31 | 99.4 | 200.2015 | 20.896 |   | 199.1937 |
| M+H | C12H25NO | 3.47 | 99.6 | 200.2016 | 20.211 |   | 199.1938 |
| M+H | C12H25NO | 3.57 | 97.9 | 200.2016 | 19.644 |   | 199.1938 |
| M+H | C13H29N  | 3.81 | 99.4 | 200.2380 | 12.990 |   | 199.2302 |
| M+H | C13H29N  | 3.88 | 99.1 | 200.2381 | 9.191  |   | 199.2303 |
| M+H | C13H29N  | 3.92 | 99.0 | 200.2381 | 8.266  |   | 199.2303 |
| M+H | C13H29N  | 4.09 | 99.0 | 200.2381 | 8.590  |   | 199.2303 |
| M+H | C13H29N  | 1.50 | 95.9 | 200.2381 | 8.830  | Y | 199.2303 |
| M+H | C13H29N  | 4.14 | 99.4 | 200.2381 | 13.638 |   | 199.2303 |
| M+H | C12H27NO | 2.20 | 98.7 | 202.2170 | 4.673  |   | 201.2092 |
| M+H | C12H27NO | 2.54 | 98.9 | 202.2171 | 5.324  |   | 201.2093 |
| M+H | C12H27NO | 2.60 | 97.5 | 202.2171 | 4.366  |   | 201.2093 |
| M+H | C12H27NO | 3.06 | 98.1 | 202.2172 | 4.980  |   | 201.2094 |
| M+H | C13H21NO | 4.75 | 79.5 | 208.1706 | 11.894 |   | 207.1628 |
| M+H | C14H25N  | 3.18 | 89.7 | 208.2066 | 3.168  |   | 207.1988 |
| M+H | C14H25N  | 3.34 | 97.0 | 208.2067 | 3.765  |   | 207.1989 |
| M+H | C14H25N  | 3.34 | 98.4 | 208.2067 | 4.845  |   | 207.1989 |
| M+H | C12H16O3 | 4.50 | 98.2 | 209.1183 | 15.214 | Y | 208.1105 |
| M+H | C14H27N  | 3.33 | 90.3 | 210.2223 | 5.425  |   | 209.2145 |
| M+H | C14H27N  | 3.78 | 92.1 | 210.2224 | 6.350  |   | 209.2146 |
| M+H | C14H27N  | 3.82 | 95.7 | 210.2224 | 11.209 |   | 209.2146 |
| M+H | C14H27N  | 3.91 | 95.3 | 210.2224 | 5.921  |   | 209.2146 |
| M+H | C14H27N  | 4.05 | 94.2 | 210.2225 | 6.589  |   | 209.2147 |
| M+H | C14H27N  | 4.14 | 97.5 | 210.2225 | 6.110  |   | 209.2147 |
| M+H | C14H27N  | 4.21 | 93.4 | 210.2225 | 5.665  |   | 209.2147 |
| M+H | C14H29N  | 4.35 | 78.2 | 212.2382 | 13.571 |   | 211.2304 |

|     |           |      |      |          |        |   |          |
|-----|-----------|------|------|----------|--------|---|----------|
| M+H | C14H29N   | 4.46 | 94.0 | 212.2382 | 7.548  |   | 211.2304 |
| M+H | C14H29N   | 4.93 | 97.8 | 212.2383 | 12.869 |   | 211.2305 |
| M+H | C14H29N   | 3.80 | 98.8 | 212.2384 | 9.242  | Y | 211.2306 |
| M+H | C14H29N   | 5.60 | 98.4 | 212.2385 | 8.678  |   | 211.2307 |
| M+H | C14H29N   | 3.80 | 98.5 | 212.2386 | 7.993  | Y | 211.2308 |
| M+H | C14H29N   | 3.80 | 98.5 | 212.2386 | 8.455  | Y | 211.2308 |
| M+H | C14H29N   | 3.80 | 97.8 | 212.2386 | 8.917  | Y | 211.2308 |
| M+H | C13H27NO  | 4.86 | 96.5 | 214.2176 | 21.854 |   | 213.2098 |
| M+H | C13H27NO  | 2.30 | 93.0 | 214.2176 | 6.539  | Y | 213.2098 |
| M+H | C13H27NO  | 1.90 | 98.4 | 214.2177 | 22.503 | Y | 213.2099 |
| M+H | C13H27NO  | 3.70 | 99.3 | 214.2180 | 23.120 | Y | 213.2102 |
| M+H | C14H31N   | 1.40 | 97.4 | 214.2538 | 9.910  | Y | 213.2460 |
| M+H | C14H31N   | 1.40 | 99.9 | 214.2538 | 14.067 | Y | 213.2460 |
| M+H | C14H31N   | 5.23 | 99.4 | 214.2540 | 13.638 |   | 213.2462 |
| M+H | C14H31N   | 3.30 | 95.1 | 214.2542 | 10.645 | Y | 213.2464 |
| M+H | C14H31N   | 3.70 | 98.7 | 214.2543 | 10.389 | Y | 213.2465 |
| M+H | C14H31N   | 3.70 | 99.1 | 214.2543 | 11.226 | Y | 213.2465 |
| M+H | C14H31N   | 6.49 | 99.4 | 214.2543 | 15.146 |   | 213.2465 |
| M+H | C14H31N   | 4.20 | 99.5 | 214.2544 | 14.529 | Y | 213.2466 |
| M+H | C12H26N2O | 4.60 | 95.9 | 215.2131 | 19.132 | Y | 214.2053 |
| M+H | C13H29NO  | 4.47 | 98.2 | 216.2332 | 6.195  |   | 215.2254 |
| M+H | C13H29NO  | 4.55 | 98.2 | 216.2332 | 6.846  |   | 215.2254 |
| M+H | C13H29NO  | 2.30 | 98.3 | 216.2332 | 7.187  | Y | 215.2254 |
| M+H | C13H29NO  | 3.20 | 98.3 | 216.2334 | 6.522  | Y | 215.2256 |
| M+H | C15H22O   | 4.05 | 84.7 | 219.1752 | 22.333 |   | 218.1674 |
| M+H | C15H27N   | 3.99 | 94.9 | 222.2225 | 7.136  |   | 221.2147 |
| M+H | C15H27N   | 4.67 | 98.7 | 222.2227 | 5.442  |   | 221.2149 |
| M+H | C15H27N   | 4.99 | 96.4 | 222.2227 | 6.539  |   | 221.2149 |
| M+H | C15H27N   | 5.31 | 92.8 | 222.2228 | 5.921  |   | 221.2150 |
| M+H | C15H26O   | 4.06 | 94.4 | 223.2065 | 24.969 |   | 222.1987 |
| M+H | C15H29N   | 3.80 | 94.0 | 224.2381 | 9.481  |   | 223.2303 |
| M+H | C15H29N   | 4.28 | 92.4 | 224.2382 | 12.801 |   | 223.2304 |
| M+H | C15H29N   | 4.52 | 89.4 | 224.2383 | 7.666  |   | 223.2305 |
| M+H | C15H29N   | 4.61 | 91.7 | 224.2383 | 8.934  |   | 223.2305 |
| M+H | C15H29N   | 4.80 | 92.2 | 224.2383 | 8.128  |   | 223.2305 |
| M+H | C13H23NO2 | 3.10 | 96.0 | 226.1813 | 11.894 | Y | 225.1735 |
| M+H | C15H31N   | 4.74 | 87.7 | 226.2540 | 14.478 |   | 225.2462 |
| M+H | C15H31N   | 3.10 | 95.5 | 226.2542 | 10.780 | Y | 225.2464 |
| M+H | C15H31N   | 3.10 | 97.9 | 226.2542 | 10.935 | Y | 225.2464 |
| M+H | C15H31N   | 5.68 | 98.6 | 226.2542 | 10.558 |   | 225.2464 |
| M+H | C15H31N   | 3.50 | 98.6 | 226.2543 | 11.313 | Y | 225.2465 |
| M+H | C15H21N   | 4.00 | 96.8 | 226.2544 | 9.755  | Y | 225.2466 |
| M+H | C15H31N   | 4.40 | 96.0 | 226.2545 | 9.977  | Y | 225.2467 |



|     |          |       |      |          |        |   |          |
|-----|----------|-------|------|----------|--------|---|----------|
| M+H | C14H29NO | 3.70  | 94.8 | 228.2330 | 21.682 |   | 227.2252 |
| M+H | C14H29NO | 3.97  | 96.4 | 228.2331 | 23.974 |   | 227.2253 |
| M+H | C14H29NO | 4.53  | 96.3 | 228.2332 | 24.692 |   | 227.2254 |
| M+H | C14H29NO | 4.57  | 93.9 | 228.2332 | 8.506  |   | 227.2254 |
| M+H | C14H29NO | 3.10  | 98.4 | 228.2335 | 25.293 | Y | 227.2257 |
| M+H | C15H33N  | -3.10 | 92.8 | 228.2684 | 12.407 | Y | 227.2606 |
| M+H | C15H33N  | 3.29  | 99.1 | 228.2693 | 16.547 |   | 227.2615 |
| M+H | C15H33N  | 3.76  | 99.1 | 228.2694 | 15.966 |   | 227.2616 |
| M+H | C15H33N  | 3.77  | 98.8 | 228.2694 | 12.953 |   | 227.2616 |
| M+H | C15H33N  | 3.79  | 99.9 | 228.2694 | 15.093 |   | 227.2616 |
| M+H | C15H33N  | 3.99  | 98.5 | 228.2695 | 12.271 |   | 227.2617 |
| M+H | C15H33N  | 4.15  | 99.5 | 228.2695 | 15.538 |   | 227.2617 |
| M+H | C15H32N  | 3.90  |      | 228.2700 | 11.809 | Y | 227.2622 |
| M+H | C14H12O3 | 4.95  | 96.8 | 229.0870 | 18.362 |   | 228.0792 |
| M+H | C14H31NO | 2.51  | 96.7 | 230.2484 | 8.300  |   | 229.2406 |
| M+H | C14H31NO | 3.00  | 90.5 | 230.2485 | 13.469 |   | 229.2407 |
| M+H | C14H31NO | 3.44  | 97.6 | 230.2486 | 7.993  |   | 229.2408 |
| M+H | C14H31NO | 3.63  | 97.6 | 230.2487 | 10.490 |   | 229.2409 |
| M+H | C14H31NO | 3.82  | 94.2 | 230.2487 | 10.284 |   | 229.2409 |
| M+H | C14H31NO | 4.01  | 98.2 | 230.2488 | 8.641  |   | 229.2410 |
| M+H | C14H31NO | 4.41  | 97.2 | 230.2489 | 8.951  |   | 229.2411 |
| M+H | C14H31NO | 5.47  | 97.6 | 230.2491 | 12.373 |   | 229.2413 |
| M+H | C15H22O2 | 3.41  | 95.1 | 235.1701 | 21.099 |   | 234.1623 |
| M+H | C16H29N  | 2.69  | 90.9 | 236.2379 | 8.145  |   | 235.2301 |
| M+H | C16H29N  | 2.79  | 90.9 | 236.2379 | 8.796  |   | 235.2301 |
| M+H | C16H29N  | 2.90  | 91.1 | 236.2380 | 7.666  |   | 235.2302 |
| M+H | C16H29N  | 3.29  | 82.3 | 236.2381 | 9.397  |   | 235.2303 |
| M+H | C16H31N  | 2.32  | 86.4 | 238.2535 | 14.427 |   | 237.2457 |
| M+H | C16H31N  | 2.65  | 89.9 | 238.2536 | 10.115 |   | 237.2458 |
| M+H | C15H29NO | 4.25  | 98.0 | 240.2332 | 14.684 |   | 239.2254 |
| M+H | C16H33N  | 2.79  | 89.4 | 240.2692 | 15.916 |   | 239.2614 |
| M+H | C16H33N  | 3.64  | 98.4 | 240.2694 | 13.125 |   | 239.2616 |
| M+H | C16H33N  | 3.90  | 96.8 | 240.2695 | 12.305 |   | 239.2617 |
| M+H | C16H33N  | 3.90  | 98.7 | 240.2695 | 12.663 |   | 239.2617 |
| M+H | C16H33N  | 2.50  |      | 240.2697 | 11.944 | Y | 239.2619 |
| M+H | C16H34N  | 2.90  |      | 240.2698 | 12.150 |   | 239.2620 |
| M+H | C16H34N  | 2.90  | 96.8 | 240.2698 | 12.407 | Y | 239.2620 |
| M+H | C15H31NO | 2.65  | 96.1 | 242.2485 | 26.457 |   | 241.2407 |
| M+H | C15H31NO | 2.91  | 79.6 | 242.2485 | 23.325 |   | 241.2407 |
| M+H | C15H31NO | 2.91  | 97.3 | 242.2485 | 26.062 |   | 241.2407 |
| M+H | C15H31NO | 3.00  | 95.2 | 242.2486 | 23.805 |   | 241.2408 |
| M+H | C15H31NO | 3.30  | 93.4 | 242.2486 | 10.028 |   | 241.2408 |
| M+H | C15H31NO | 3.32  | 99.3 | 242.2486 | 27.432 |   | 241.2408 |

|     |            |      |      |          |        |   |          |
|-----|------------|------|------|----------|--------|---|----------|
| M+H | C15H31NO   | 3.44 | 97.9 | 242.2487 | 26.849 |   | 241.2409 |
| M+H | C15H31NO   | 2.90 | 95.8 | 242.2496 | 10.662 | Y | 241.2418 |
| M+H | C16H35N    | 3.57 | 98.1 | 242.2851 | 13.503 |   | 241.2773 |
| M+H | C16H35N    | 3.63 | 99.4 | 242.2851 | 16.395 |   | 241.2773 |
| M+H | C16H35N    | 3.70 | 98.7 | 242.2851 | 16.719 |   | 241.2773 |
| M+H | C16H35N    | 1.70 | 96.7 | 242.2852 | 13.743 |   | 241.2774 |
| M+H | C16H35N    | 4.35 | 98.9 | 242.2853 | 16.908 |   | 241.2775 |
| M+H | C16H35N    | 4.38 | 98.9 | 242.2853 | 17.319 |   | 241.2775 |
| M+H | C16H35N    | 4.40 | 98.7 | 242.2853 | 14.546 |   | 241.2775 |
| M+H | C16H35N    | 4.45 | 97.7 | 242.2853 | 13.948 |   | 241.2775 |
| M+H | C16H35N    | 4.66 | 98.8 | 242.2854 | 17.900 |   | 241.2776 |
| M+H | C15H33NO   | 2.68 | 97.9 | 244.2641 | 10.524 |   | 243.2563 |
| M+H | C15H33NO   | 3.07 | 96.8 | 244.2642 | 10.251 |   | 243.2564 |
| M+H | C15H33NO   | 3.60 | 97.2 | 244.2644 | 9.498  |   | 243.2566 |
| M+H | C15H33NO   | 3.97 | 96.0 | 244.2645 | 9.636  |   | 243.2567 |
| M+H | C17H29N    | 3.39 | 87.6 | 248.2381 | 11.124 |   | 247.2303 |
| M+H | C14H20N2O2 | 4.64 | 96.7 | 249.1609 | 9.157  |   | 248.1531 |
| M+H | C14H20N2O2 | 4.40 | 97.6 | 249.1614 | 9.977  | Y | 248.1536 |
| M+H | C17H31N    | 3.50 | 88.6 | 250.2538 | 10.868 |   | 249.2460 |
| M+H | C17H30O    | 2.61 | 96.8 | 251.2376 | 29.450 |   | 250.2298 |
| M+H | C17H34N    | 1.60 | 92.4 | 252.2683 | 12.407 | Y | 251.2605 |
| M+H | C17H33N    | 3.17 | 85.1 | 252.2694 | 15.811 |   | 251.2616 |
| M+H | C17H33N    | 1.60 |      | 252.2695 | 12.150 |   | 251.2617 |
| M+H | C17H33N    | 4.36 | 90.2 | 252.2697 | 12.373 |   | 251.2619 |
| M+H | C17H35N    | 4.55 | 92.7 | 254.2854 | 17.266 |   | 253.2776 |
| M+H | C17H35N    | 5.84 | 98.0 | 254.2857 | 14.323 |   | 253.2779 |
| M+H | C16H33NO   | 4.26 | 93.1 | 256.2646 | 11.792 |   | 255.2568 |
| M+H | C16H33NO   | 4.82 | 96.5 | 256.2647 | 28.954 |   | 255.2569 |
| M+H | C16H33NO   | 3.90 | 97.0 | 256.2648 | 29.538 | Y | 255.2570 |
| M+H | C16H33NO   | 3.90 | 98.6 | 256.2648 | 28.151 | Y | 255.2570 |
| M+H | C17H37N    | 3.10 | 99.5 | 256.3013 | 18.224 | Y | 255.2935 |
| M+H | C17H37N    | 3.50 | 98.2 | 256.3013 | 15.059 | Y | 255.2935 |
| M+H | C17H37N    | 3.50 | 98.2 | 256.3013 | 15.420 | Y | 255.2935 |
| M+H | C17H37N    | 3.10 | 98.3 | 256.3013 | 18.021 | Y | 255.2935 |
| M+H | C17H37N    | 3.90 | 99.3 | 256.3014 | 17.660 | Y | 255.2936 |
| M+H | C17H37N    | 4.30 | 98.8 | 256.3015 | 16.000 | Y | 255.2937 |
| M+H | C17H37N    | 4.70 | 99.0 | 256.3016 | 19.219 | Y | 255.2938 |
| M+H | C16H35NO   | 3.94 | 97.1 | 258.2802 | 11.978 |   | 257.2724 |
| M+H | C16H35NO   | 4.19 | 87.8 | 258.2802 | 16.479 |   | 257.2724 |
| M+H | C16H35NO   | 4.32 | 94.2 | 258.2803 | 13.726 |   | 257.2725 |
| M+H | C16H35NO   | 4.33 | 94.5 | 258.2803 | 11.141 |   | 257.2725 |
| M+H | C16H35NO   | 4.63 | 95.5 | 258.2803 | 11.398 |   | 257.2725 |
| M+H | C16H35NO   | 4.89 | 95.7 | 258.2804 | 11.722 |   | 257.2726 |

|     |            |      |      |          |        |   |          |
|-----|------------|------|------|----------|--------|---|----------|
| M+H | C18H31N    | 4.81 | 90.1 | 262.2542 | 13.571 |   | 261.2464 |
| M+H | C15H22N2O2 | 4.77 | 98.1 | 263.1767 | 12.646 |   | 262.1689 |
| M+H | C15H22N2O2 | 4.87 | 97.8 | 263.1767 | 11.843 |   | 262.1689 |
| M+H | C15H21NO3  | 3.40 | 92.6 | 264.1608 | 16.787 | Y | 263.1530 |
| M+H | C18H33N    | 3.79 | 79.2 | 264.2696 | 13.230 |   | 263.2618 |
| M+H | C18H33N    | 3.87 | 87.2 | 264.2696 | 12.714 |   | 263.2618 |
| M+H | C16H24O3   | 4.99 | 97.1 | 265.1811 | 21.169 |   | 264.1733 |
| M+H | C18H35N    | 3.17 | 81.1 | 266.2851 | 16.857 |   | 265.2773 |
| M+H | C18H35N    | 4.55 | 89.2 | 266.2854 | 13.726 |   | 265.2776 |
| M+H | C18H34O    | 2.43 | 81.9 | 267.2689 | 32.753 |   | 266.2611 |
| M+H | C17H33NO   | 4.98 | 97.2 | 268.2648 | 18.021 |   | 267.2570 |
| M+H | C18H37N    | 3.56 | 96.9 | 268.3008 | 16.240 |   | 267.2930 |
| M+H | C18H37N    | 3.83 | 94.9 | 268.3009 | 18.585 |   | 267.2931 |
| M+H | C18H37N    | 3.97 | 94.2 | 268.3009 | 15.504 |   | 267.2931 |
| M+H | C18H37N    | 4.09 | 98.2 | 268.3010 | 15.710 |   | 267.2932 |
| M+H | C17H35NO   | 2.40 | 93.5 | 270.2798 | 30.648 |   | 269.2720 |
| M+H | C17H35NO   | 3.02 | 89.2 | 270.2800 | 30.442 |   | 269.2722 |
| M+H | C17H35NO   | 3.08 | 97.5 | 270.2800 | 31.640 |   | 269.2722 |
| M+H | C17H35NO   | 3.09 | 95.8 | 270.2800 | 30.084 |   | 269.2722 |
| M+H | C17H35NO   | 3.37 | 95.8 | 270.2800 | 31.043 |   | 269.2722 |
| M+H | C18H39N    | 3.11 | 97.4 | 270.3164 | 16.378 |   | 269.3086 |
| M+H | C18H39N    | 3.74 | 98.9 | 270.3165 | 17.353 |   | 269.3087 |
| M+H | C18H39N    | 4.41 | 97.9 | 270.3167 | 16.823 |   | 269.3089 |
| M+H | C18H39N    | 4.56 | 98.7 | 270.3168 | 19.303 |   | 269.3090 |
| M+H | C18H39N    | 4.64 | 98.6 | 270.3168 | 20.484 |   | 269.3090 |
| M+H | C18H39N    | 4.68 | 99.2 | 270.3168 | 18.858 |   | 269.3090 |
| M+H | C18H39N    | 4.75 | 99.2 | 270.3168 | 19.509 |   | 269.3090 |
| M+H | C18H39N    | 4.82 | 98.9 | 270.3168 | 19.938 |   | 269.3090 |
| M+H | C18H10N2O  | 3.30 | 96.5 | 271.0875 | 16.257 |   | 270.0797 |
| M+H | C17H37NO   | 2.92 | 98.1 | 272.2956 | 15.110 |   | 271.2878 |
| M+H | C17H37NO   | 4.73 | 97.6 | 272.2961 | 16.601 |   | 271.2883 |
| M+H | C19H33N    | 2.39 | 83.9 | 276.2692 | 12.271 |   | 275.2614 |
| M+H | C19H33N    | 3.25 | 88.9 | 276.2695 | 15.248 |   | 275.2617 |
| M+H | C16H24N2O2 | 2.92 | 97.7 | 277.1919 | 14.306 |   | 276.1841 |
| M+H | C16H23NO3  | 3.34 | 94.9 | 278.1760 | 19.287 |   | 277.1682 |
| M+H | C16H23NO3  | 3.40 | 93.2 | 278.1760 | 18.602 |   | 277.1682 |
| M+H | C16H23NO3  | 3.88 | 99.4 | 278.1761 | 19.799 |   | 277.1683 |
| M+H | C19H35N    | 1.90 | 83.1 | 278.2848 | 14.853 |   | 277.2770 |
| M+H | C19H35N    | 2.00 | 84.9 | 278.2848 | 14.374 |   | 277.2770 |
| M+H | C19H37N    | 1.89 | 87.4 | 280.3004 | 15.453 |   | 279.2926 |
| M+H | C18H32O2   | 4.16 | 93.3 | 281.2487 | 20.090 |   | 280.2409 |
| M+H | C18H35NO   | 3.40 | 91.2 | 282.2801 | 29.160 |   | 281.2723 |
| M+H | C18H35NO   | 3.59 | 76.4 | 282.2802 | 26.558 |   | 281.2724 |

|     |            |      |      |          |        |   |          |
|-----|------------|------|------|----------|--------|---|----------|
| M+H | C18H35NO   | 4.42 | 93.9 | 282.2804 | 21.733 |   | 281.2726 |
| M+H | C19H39N    | 2.86 | 96.1 | 282.3163 | 17.626 |   | 281.3085 |
| M+H | C19H39N    | 2.87 | 93.3 | 282.3163 | 16.908 |   | 281.3085 |
| M+H | C19H39N    | 3.05 | 96.5 | 282.3164 | 19.867 |   | 281.3086 |
| M+H | C19H39N    | 3.26 | 98.0 | 282.3164 | 17.130 |   | 281.3086 |
| M+H | C18H37NO   | 3.17 | 97.7 | 284.2957 | 32.291 |   | 283.2879 |
| M+H | C18H37NO   | 3.30 | 97.5 | 284.2957 | 33.712 |   | 283.2879 |
| M+H | C18H37NO   | 3.44 | 86.0 | 284.2958 | 32.719 |   | 283.2880 |
| M+H | C18H37NO   | 3.48 | 92.4 | 284.2958 | 33.114 |   | 283.2880 |
| M+H | C19H41N    | 2.86 | 97.1 | 284.3320 | 17.711 |   | 283.3242 |
| M+H | C19H41N    | 2.97 | 98.2 | 284.3320 | 20.758 |   | 283.3242 |
| M+H | C19H41N    | 3.12 | 99.4 | 284.3321 | 18.979 |   | 283.3243 |
| M+H | C19H41N    | 3.59 | 99.0 | 284.3322 | 21.784 |   | 283.3244 |
| M+H | C19H41N    | 3.74 | 96.5 | 284.3322 | 18.021 |   | 283.3244 |
| M+H | C19H41N    | 3.74 | 98.4 | 284.3322 | 21.186 |   | 283.3244 |
| M+H | C19H41N    | 3.76 | 97.5 | 284.3322 | 20.535 |   | 283.3244 |
| M+H | C19H41N    | 3.86 | 98.7 | 284.3323 | 20.039 |   | 283.3245 |
| M+H | C19H41N    | 4.19 | 98.2 | 284.3324 | 18.517 |   | 283.3246 |
| M+H | C19H12N2O  | 4.43 | 96.3 | 285.1035 | 18.875 |   | 284.0957 |
| M+H | C18H39NO   | 1.93 | 96.4 | 286.3110 | 15.899 |   | 285.3032 |
| M+H | C18H39NO   | 1.95 | 94.3 | 286.3110 | 16.530 |   | 285.3032 |
| M+H | C18H39NO   | 2.73 | 95.7 | 286.3112 | 14.391 |   | 285.3034 |
| M+H | C18H39NO   | 3.26 | 96.6 | 286.3114 | 14.597 |   | 285.3036 |
| M+H | C20H35N    | 2.80 | 84.6 | 290.2850 | 14.117 |   | 289.2772 |
| M+H | C17H26N2O2 | 3.97 | 95.3 | 291.2079 | 17.232 |   | 290.2001 |
| M+H | C17H25NO3  | 3.72 | 88.4 | 292.1918 | 21.510 |   | 291.1840 |
| M+H | C20H39N    | 3.05 | 87.4 | 294.3164 | 16.823 |   | 293.3086 |
| M+H | C20H41N    | 3.29 | 93.1 | 296.3321 | 21.135 |   | 295.3243 |
| M+H | C20H41N    | 3.82 | 92.3 | 296.3323 | 18.447 |   | 295.3245 |
| M+H | C20H41N    | 4.07 | 96.6 | 296.3324 | 18.943 |   | 295.3246 |
| M+H | C19H39NO   | 2.02 | 92.5 | 298.3110 | 34.754 |   | 297.3032 |
| M+H | C19H39NO   | 3.22 | 98.0 | 298.3114 | 35.783 |   | 297.3036 |
| M+H | C19H39NO   | 3.47 | 97.0 | 298.3115 | 35.183 |   | 297.3037 |
| M+H | C19H39NO   | 3.52 | 90.1 | 298.3115 | 34.515 |   | 297.3037 |
| M+H | C19H39NO   | 3.54 | 97.7 | 298.3115 | 33.985 |   | 297.3037 |
| M+H | C20H43N    | 4.54 | 97.3 | 298.3482 | 21.767 |   | 297.3404 |
| M+H | C20H43N    | 4.64 | 96.8 | 298.3482 | 18.926 |   | 297.3404 |
| M+H | C19H41NO   | 0.86 | 93.0 | 300.3263 | 14.924 |   | 299.3185 |
| M+H | C19H41NO   | 1.40 | 94.5 | 300.3265 | 15.093 |   | 299.3187 |
| M+H | C19H41NO   | 2.64 | 92.2 | 300.3269 | 16.753 |   | 299.3191 |
| M+H | C19H41NO   | 3.31 | 92.2 | 300.3271 | 15.811 |   | 299.3193 |
| M+H | C19H41NO   | 3.57 | 92.5 | 300.3272 | 15.625 |   | 299.3194 |
| M+H | C19H41NO   | 4.00 | 96.2 | 300.3281 | 19.030 | Y | 299.3203 |

|     |            |       |      |          |        |   |          |
|-----|------------|-------|------|----------|--------|---|----------|
| M+H | C21H37N    | 3.30  | 84.7 | 304.3009 | 16.513 |   | 303.2931 |
| M+H | C18H28N2O2 | 3.58  | 93.8 | 305.2234 | 19.253 |   | 304.2156 |
| M+H | C22H11NO   | 3.30  | 94.5 | 306.0929 | 23.650 | Y | 305.0851 |
| M+H | C21H39N    | 1.81  | 80.0 | 306.3161 | 17.302 |   | 305.3083 |
| M+H | C21H41N    | 2.82  | 86.4 | 308.3320 | 18.568 |   | 307.3242 |
| M+H | C20H39NO   | 3.13  | 83.7 | 310.3114 | 32.942 |   | 309.3036 |
| M+H | C21H43N    | 2.26  | 90.3 | 310.3475 | 19.475 |   | 309.3397 |
| M+H | C21H43N    | 2.95  | 94.3 | 310.3477 | 22.401 |   | 309.3399 |
| M+H | C21H43N    | 3.04  | 97.6 | 310.3478 | 20.211 |   | 309.3400 |
| M+H | C20H41NO   | 2.17  | 91.4 | 312.3268 | 35.901 |   | 311.3190 |
| M+H | C20H41NO   | 3.88  | 91.8 | 312.3273 | 16.874 |   | 311.3195 |
| M+H | C21H45N    | 3.56  | 97.5 | 312.3636 | 24.453 |   | 311.3558 |
| M+H | C21H45N    | 4.01  | 97.6 | 312.3637 | 23.292 |   | 311.3559 |
| M+H | C21H45N    | 4.30  | 96.9 | 312.3638 | 20.417 |   | 311.3560 |
| M+H | C21H45N    | 4.39  | 97.3 | 312.3638 | 23.771 |   | 311.3560 |
| M+H | C21H45N    | 4.41  | 96.5 | 312.3639 | 22.999 |   | 311.3561 |
| M+H | C21H45N    | 4.70  | 98.4 | 312.3639 | 22.350 |   | 311.3561 |
| M+H | C21H45N    | 4.70  | 99.0 | 312.3639 | 20.775 |   | 311.3561 |
| M+H | C20H12N2O2 | 4.97  | 97.5 | 313.0987 | 18.875 |   | 312.0909 |
| M+H | C20H43NO   | 0.45  | 94.1 | 314.3419 | 16.479 |   | 313.3341 |
| M+H | C20H43NO   | 2.05  | 93.8 | 314.3424 | 17.968 |   | 313.3346 |
| M+H | C20H43NO   | 2.36  | 91.2 | 314.3425 | 17.009 |   | 313.3347 |
| M+H | C20H43NO   | 4.89  | 97.7 | 314.3433 | 20.177 |   | 313.3355 |
| M+H | C22H39N    | 0.54  | 80.5 | 318.3157 | 17.215 |   | 317.3079 |
| M+H | C22H39N    | 2.64  | 91.1 | 318.3164 | 19.422 |   | 317.3086 |
| M+H | C22H39N    | 3.32  | 96.9 | 318.3166 | 19.661 |   | 317.3088 |
| M+H | C19H30N2O2 | 2.16  | 91.2 | 319.2387 | 21.220 |   | 318.2309 |
| M+H | C22H41N    | 0.46  | 78.9 | 320.3313 | 18.619 |   | 319.3235 |
| M+H | C22H40O    | 1.79  | 94.1 | 321.3158 | 32.993 |   | 320.3080 |
| M+H | C21H39NO   | 4.04  | 87.1 | 322.3117 | 14.117 |   | 321.3039 |
| M+H | C22H43N    | 0.81  | 80.8 | 322.3471 | 19.715 |   | 321.3393 |
| M+H | C22H45N    | 1.24  | 94.9 | 324.3629 | 21.443 |   | 323.3551 |
| M+H | C22H45N    | 2.22  | 90.7 | 324.3632 | 20.484 |   | 323.3554 |
| M+H | C22H47N    | 1.97  | 96.9 | 326.3788 | 25.806 |   | 325.3710 |
| M+H | C22H47N    | 2.18  | 96.8 | 326.3788 | 21.476 |   | 325.3710 |
| M+H | C22H47N    | 2.22  | 98.0 | 326.3788 | 23.531 |   | 325.3710 |
| M+H | C22H47N    | 2.40  | 98.2 | 326.3789 | 25.087 |   | 325.3711 |
| M+H | C22H47N    | 2.63  | 98.6 | 326.3790 | 22.195 |   | 325.3712 |
| M+H | C22H47N    | 2.89  | 98.4 | 326.3791 | 21.922 |   | 325.3713 |
| M+H | C21H45NO   | -4.17 | 93.8 | 328.3560 | 17.266 |   | 327.3482 |
| M+H | C21H45NO   | -0.37 | 95.3 | 328.3573 | 17.643 |   | 327.3495 |
| M+H | C21H45NO   | 1.10  | 93.0 | 328.3578 | 18.156 |   | 327.3500 |
| M+H | C21H45NO   | 1.40  | 92.2 | 328.3579 | 19.148 |   | 327.3501 |

|     |            |       |      |          |        |          |
|-----|------------|-------|------|----------|--------|----------|
| M+H | C21H45NO   | 4.22  | 95.5 | 328.3588 | 21.304 | 327.3510 |
| M+H | C23H41N    | -4.15 | 75.8 | 332.3298 | 18.740 | 331.3220 |
| M+H | C23H41N    | 2.62  | 89.6 | 332.3320 | 19.182 | 331.3242 |
| M+H | C23H41N    | 2.65  | 92.6 | 332.3321 | 21.048 | 331.3243 |
| M+H | C23H43N    | -4.42 | 75.5 | 334.3454 | 19.901 | 333.3376 |
| M+H | C22H41NO   | 3.36  | 83.4 | 336.3272 | 15.538 | 335.3194 |
| M+H | C23H45N    | 0.63  | 79.4 | 336.3627 | 20.825 | 335.3549 |
| M+H | C22H43NO   | 3.22  | 97.7 | 338.3428 | 32.993 | 337.3350 |
| M+H | C23H47N    | 2.44  | 92.6 | 338.3789 | 21.699 | 337.3711 |
| M+H | C23H49N    | 2.36  | 95.8 | 340.3946 | 26.440 | 339.3868 |
| M+H | C23H49N    | 2.50  | 91.7 | 340.3946 | 23.565 | 339.3868 |
| M+H | C23H49N    | 2.84  | 96.9 | 340.3947 | 24.692 | 339.3869 |
| M+H | C23H49N    | 3.15  | 96.1 | 340.3948 | 22.573 | 339.3870 |
| M+H | C23H49N    | 3.97  | 98.0 | 340.3951 | 22.965 | 339.3873 |
| M+H | C23H20N2O  | 3.44  | 96.6 | 341.1660 | 27.672 | 340.1582 |
| M+H | C21H40O3   | 3.16  | 99.5 | 341.3061 | 32.753 | 340.2983 |
| M+H | C22H47NO   | -3.41 | 92.9 | 342.3719 | 18.791 | 341.3641 |
| M+H | C22H47NO   | 1.95  | 90.3 | 342.3737 | 19.287 | 341.3659 |
| M+H | C22H47NO   | 2.10  | 90.5 | 342.3738 | 20.279 | 341.3660 |
| M+H | C24H38O    | -7.23 | 92.8 | 343.2971 | 14.684 | 342.2893 |
| M+H | C19H38N2O3 | 4.52  | 96.7 | 343.2971 | 14.684 | 342.2893 |
| M+H | C24H43N    | -1.91 | 76.6 | 346.3462 | 19.938 | 345.3384 |
| M+H | C24H43N    | 3.12  | 95.5 | 346.3479 | 22.469 | 345.3401 |
| M+H | C21H33NO3  | 4.57  | 88.1 | 348.2549 | 28.286 | 347.2471 |
| M+H | C24H45N    | -1.20 | 75.0 | 348.3621 | 21.152 | 347.3543 |
| M+H | C23H43NO   | 4.27  | 85.4 | 350.3432 | 17.215 | 349.3354 |
| M+H | C24H47N    | 0.07  | 77.6 | 350.3782 | 21.905 | 349.3704 |
| M+H | C24H49N    | 2.99  | 92.0 | 352.3948 | 22.624 | 351.3870 |
| M+H | C24H23N3   | -4.99 | 94.3 | 354.1947 | 31.727 | 353.1869 |
| M+H | C24H51N    | -0.76 | 96.5 | 354.4092 | 23.292 | 353.4014 |
| M+H | C24H51N    | 2.08  | 98.8 | 354.4102 | 25.890 | 353.4024 |
| M+H | C24H51N    | 2.21  | 98.0 | 354.4102 | 27.844 | 353.4024 |
| M+H | C24H51N    | 2.96  | 96.3 | 354.4105 | 24.027 | 353.4027 |
| M+H | C23H49NO   | -2.63 | 93.9 | 356.3878 | 19.867 | 355.3800 |
| M+H | C23H49NO   | 1.47  | 92.5 | 356.3892 | 21.338 | 355.3814 |
| M+H | C23H49NO   | 1.76  | 92.1 | 356.3893 | 20.417 | 355.3815 |
| M+H | C22H33NO3  | 1.84  | 93.1 | 360.2540 | 28.562 | 359.2462 |
| M+H | C25H45N    | 2.20  | 94.6 | 360.3633 | 23.838 | 359.3555 |
| M+H | C22H35NO3  | 1.33  | 91.9 | 362.2695 | 29.673 | 361.2617 |
| M+H | C22H35NO3  | 1.85  | 89.8 | 362.2696 | 30.017 | 361.2618 |
| M+H | C24H45NO   | 3.12  | 84.9 | 364.3585 | 18.072 | 363.3507 |
| M+H | C25H49N    | -0.92 | 75.2 | 364.3934 | 22.982 | 363.3856 |
| M+H | C25H53N    | 0.68  | 88.0 | 368.4253 | 29.281 | 367.4175 |

|     |            |       |      |          |        |          |
|-----|------------|-------|------|----------|--------|----------|
| M+H | C25H53N    | 0.83  | 94.7 | 368.4254 | 27.125 | 367.4176 |
| M+H | C25H53N    | 1.28  | 98.3 | 368.4255 | 25.155 | 367.4177 |
| M+H | C24H20N2O2 | 2.64  | 96.5 | 369.1607 | 27.672 | 368.1529 |
| M+H | C25H24N2O  | 1.66  | 92.4 | 369.1968 | 31.727 | 368.1890 |
| M+H | C24H51NO   | -0.24 | 90.5 | 370.4043 | 21.578 | 369.3965 |
| M+H | C24H51NO   | 0.64  | 91.1 | 370.4046 | 22.367 | 369.3968 |
| M+H | C21H42N2O3 | 4.64  | 88.9 | 371.3285 | 18.021 | 370.3207 |
| M+H | C23H35NO3  | 1.34  | 89.4 | 374.2695 | 30.203 | 373.2617 |
| M+H | C26H47N    | 0.84  | 86.5 | 374.3784 | 22.212 | 373.3706 |
| M+H | C26H47N    | 0.98  | 90.9 | 374.3785 | 25.276 | 373.3707 |
| M+H | C23H37NO3  | 1.27  | 93.6 | 376.2851 | 31.727 | 375.2773 |
| M+H | C23H37NO3  | 1.54  | 90.1 | 376.2852 | 31.333 | 375.2774 |
| M+H | C26H53N    | 0.75  | 91.7 | 380.4254 | 24.915 | 379.4176 |
| M+H | C26H55N    | 0.91  | 92.0 | 382.4411 | 26.285 | 381.4333 |
| M+H | C26H55N    | 1.28  | 92.2 | 382.4412 | 28.357 | 381.4334 |
| M+H | C25H53NO   | -3.12 | 93.5 | 384.4188 | 22.212 | 383.4110 |
| M+H | C24H39NO3  | 1.96  | 86.8 | 390.3010 | 33.404 | 389.2932 |
| M+H | C24H39NO3  | 4.02  | 75.7 | 390.3018 | 33.010 | 389.2940 |
| M+H | C27H55N    | 1.21  | 90.8 | 394.4412 | 26.045 | 393.4334 |
| M+H | C27H57N    | 0.63  | 93.7 | 396.4566 | 26.885 | 395.4488 |
| M+H | C27H57N    | 1.14  | 88.9 | 396.4568 | 29.639 | 395.4490 |
| M+H | C27H57N    | 1.95  | 95.1 | 396.4571 | 27.415 | 395.4493 |
| M+H | C26H24N2O2 | 3.93  | 96.5 | 397.1926 | 31.727 | 396.1848 |
| M+H | C27H28N2O  | -2.66 | 94.4 | 397.2264 | 35.662 | 396.2186 |
| M+H | C25H43NO3  | -3.97 | 95.3 | 406.3300 | 32.993 | 405.3222 |
| M+H | C28H57N    | 0.16  | 90.6 | 408.4564 | 26.953 | 407.4486 |
| M+H | C28H59N    | 0.53  | 95.8 | 410.4722 | 28.340 | 409.4644 |
| M+H | C29H59N    | -0.53 | 90.0 | 422.4718 | 28.083 | 421.4640 |
| M+H | C29H61N    | -0.43 | 95.2 | 424.4875 | 29.450 | 423.4797 |
| M+H | C28H28N2O2 | 1.52  | 94.4 | 425.2230 | 35.662 | 424.2152 |
| M+H | C28H28N2O2 | 1.66  | 95.7 | 425.2231 | 28.765 | 424.2153 |
| M+H | C31H36O    | 9.58  | 88.9 | 425.2880 | 29.760 | 424.2802 |
| M+H | C26H51NO3  | -0.87 | 95.5 | 426.3938 | 35.166 | 425.3860 |
| M+H | C30H61N    | -2.49 | 82.0 | 436.4866 | 29.075 | 435.4788 |
| M+H | C30H63N    | -0.27 | 95.5 | 438.5032 | 30.051 | 437.4954 |
| M+H | C31H65N    | -0.20 | 94.7 | 452.5189 | 31.110 | 451.5111 |
| M+H | C30H32N2O2 | 2.63  | 92.6 | 453.2548 | 32.753 | 452.2470 |
| M+H | C32H67N    | -0.82 | 94.4 | 466.5342 | 32.804 | 465.5264 |
| M+H | C33H69N    | -1.30 | 94.0 | 480.5497 | 33.354 | 479.5419 |
| M+H | C36H75N    | -0.73 | 91.1 | 522.5968 | 35.456 | 521.5890 |
| M+H | C46H54     | -4.96 | 85.7 | 607.4268 | 31.711 | 606.4190 |
| M+H | C41H54N2O2 | 1.67  | 89.3 | 607.4268 | 31.711 | 606.4190 |

**Table S3.** Detailed information on the GC-MS/Polyarc-FID chromatogram of the aminated oil.

| Compound | Library ID # | RT     | Estimated parent mass | Library Match               | Match % | Conc. mg/L | Estimated Carbon # |
|----------|--------------|--------|-----------------------|-----------------------------|---------|------------|--------------------|
| Amine 1  | 1            | 4.081  | 87                    | 1-Butanamine, 3-methyl-     | 92      | 855        | 5                  |
| Amine 2  | 2            | 4.165  | 87                    | S-(-)-2-Methylbutylamine    | 96      | 2962       | 5                  |
| Amine 3  | 3            | 4.663  | 87                    | 1-Pentanamine               | 92      | 4934       | 5                  |
| Amine 9  | 9            | 8.253  | 99                    | 4-Methyl-pent-3-enylamine   | 82      | 6000       | 6                  |
| Amine 4  | 4            | 6.254  | 101                   | 2-Ethylbutylamine           | 93      | 9079       | 6                  |
| Amine 5  | 5            | 6.448  | 101                   | 2-Ethylbutylamine           | 97      | 1617       | 6                  |
| Amine 6  | 6            | 6.5    | 101                   | 2-Ethylbutylamine           | 89      | 1751       | 6                  |
| Amine 7  | 7            | 7.173  | 101                   | 1-Hexanamine                | 93      | 11173      | 6                  |
| Amine 13 | 13           | 9.896  | 113                   | Cyclohexanemethylamine      | 91      | 9579       | 7                  |
| Amine 14 | 14           | 9.993  | 113                   | octane, 1-azido             | 83      | 3061       | 7                  |
| Amine 8  | 8            | 7.826  | 115                   |                             |         | 564        | 6                  |
| Amine 10 | 10           | 9.062  | 115                   | 1-heptanamine               | 89      | 16613      | 7                  |
| Amine 11 | 11           | 9.146  | 115                   | 3-Methylhexan-1-amine       | 85      | 1149       | 7                  |
| Amine 12 | 12           | 9.346  | 115                   | 3-Methylhexan-1-amine       | 91      | 825        | 7                  |
| Amine 15 | 15           | 10.213 | 115                   | 1-Heptanamine               | 96      | 15928      | 7                  |
| Amine 17 | 16           | 11.358 | 120                   | Cyclohexanemethylamine      | 76      | 5817       | 7                  |
| Amine 18 | 17           | 11.416 | 127                   | Cyclohexanemethylamine      | 83      | 2982       | 8                  |
| Amine 19 | 18           | 11.643 | 127                   | 2,2-dimethyl-4-enylamine    | 86      | 741        | 8                  |
| Amine 16 | 63           | 10.931 | 129                   |                             |         | 5241       | 8                  |
| Amine 20 | 19           | 11.688 | 129                   | 1-Hexanamine, 2-ethyl-      | 83      | 1002       | 8                  |
| Amine 21 | 20           | 11.992 | 129                   | 1-Hexanamine, 2-ethyl-      | 95      | 2531       | 8                  |
| Amine 22 | 21           | 12.134 | 129                   | 1-Hexanamine, 2-ethyl-      | 92      | 6521       | 8                  |
| Amine 27 | 26           | 13.35  | 129                   | 1-Octanamine                | 91      | 9023       | 8                  |
| Amine 28 | 27           | 13.467 | 134                   | 2,2-dimethylhex-4-enylamine | 80      | 1438       | 8                  |
| Amine 24 | 23           | 13.04  | 136                   | 2-Decen-1-ol, (Z)-          | 84      | 2840       | 9                  |
| Amine 25 | 24           | 13.163 | 138                   | 2,2-dimethylhex-4-enylamine | 77      | 1626       | 9                  |
| Amine 26 | 25           | 13.234 | 139                   | 2,2-dimethylhex-4-enylamine | 80      | 806        | 9                  |
| Amine 23 | 22           | 12.419 | 140                   | 18-Nonadecen-1-amine        | 81      | 441        | 9                  |
| Amine 32 | 30           | 15.226 | 142                   | 1-Decanamine                | 83      | 4876       | 9                  |
| Amine 30 | 28           | 14.644 | 143                   | Unknown                     |         | 3005       | 9                  |
| Amine 35 | 31           | 16.404 | 143                   | 1-Decanamine                | 83      | 6294       | 9                  |
| Amine 29 | 64           | 14.567 | 154                   |                             |         | 1592       | 10                 |
| Amine 31 | 29           | 15.032 | 154                   | 1-Decanamine                | 75      | 2018       | 10                 |
| Amine 33 | 65           | 15.517 | 154                   |                             |         | 722        | 10                 |
| Amine 39 | 34           | 18.195 | 156                   | 1-Decanamine                | 84      | 3672       | 10                 |
| Amine 40 | 35           | 19.327 | 157                   | 1-Decanamine                | 89      | 4590       | 10                 |
| Amine 38 | 33           | 17.995 | 162                   | 1-Decanamine                | 77      | 1719       | 10                 |
| Amine 34 | 66           | 15.854 | 166                   |                             |         | 399        | 10                 |
| Amine 37 | 32           | 17.568 | 166                   | 1-Decanamine                | 79      | 1190       | 11                 |



|          |    |        |     |                      |    |      |    |
|----------|----|--------|-----|----------------------|----|------|----|
| Amine 36 | 67 | 17.432 | 168 |                      |    | 732  | 11 |
| Amine 44 | 39 | 21.022 | 170 | 1-Tridecanamine      | 82 | 3547 | 11 |
| Amine 45 | 40 | 22.096 | 171 | 1-Undecanamine       | 87 | 4868 | 11 |
| Amine 41 | 36 | 20.188 | 178 | DL-Leucine, N-glycyl | 78 | 1767 | 12 |
| Amine 42 | 37 | 20.356 | 182 | 1-Undecanamine       | 38 | 1289 | 12 |
| Amine 43 | 38 | 20.815 | 182 | 1-Tridecanamine      | 80 | 1916 | 12 |
| Amine 47 | 42 | 23.021 | 196 | Elaidamide           | 78 | 935  | 13 |
| Amine 48 | 43 | 23.493 | 196 | Unknown              |    | 829  | 13 |
| Amine 46 | 41 | 22.84  | 197 | DL-Leucine, N-glycyl | 80 | 446  | 13 |
| Amine 50 | 45 | 24.709 | 197 | 1-Tridecanamine      | 86 | 2753 | 13 |
| Amine 49 | 44 | 23.687 | 199 | 1-Tridecanamine      | 82 | 2515 | 13 |
| Amine 54 | 47 | 26.217 | 210 | 1-Tridecanamine      | 80 | 1378 | 14 |
| Amine 53 | 46 | 26.029 | 211 | 1-Tridecanamine      | 83 | 433  | 14 |
| Amine 51 | 68 | 25.363 | 213 |                      |    | 453  | 14 |
| Amine 52 | 69 | 25.57  | 213 |                      |    | 772  | 14 |
| Amine 55 | 48 | 27.18  | 213 | 1-Tridecanamine      | 84 | 2889 | 14 |
| Amine 56 | 49 | 27.659 | 225 | Unknown              |    | 797  | 15 |
| Amine 59 | 52 | 28.422 | 225 | Unknown              |    | 569  | 15 |
| Amine 57 | 50 | 27.775 | 227 | Unknown              |    | 405  | 15 |
| Amine 58 | 51 | 27.976 | 227 | Unknown              |    | 747  | 15 |
| Amine 60 | 53 | 28.603 | 227 | Unknown              |    | 980  | 15 |
| Amine 61 | 54 | 29.522 | 227 | 1-Tridecanamine      | 82 | 2043 | 15 |
| Amine 63 | 71 | 30.059 | 238 |                      |    | 283  | 16 |
| Amine 62 | 70 | 29.949 | 239 |                      |    | 282  | 16 |
| Amine 64 | 72 | 30.266 | 241 |                      |    | 224  | 16 |
| Amine 65 | 55 | 30.712 | 241 | Unknown              |    | 398  | 16 |
| Amine 66 | 56 | 30.88  | 241 | Unknown              |    | 1093 | 16 |
| Amine 69 | 74 | 32.122 | 252 |                      |    | 96   | 17 |
| Amine 71 | 58 | 32.879 | 252 | Unknown              |    | 113  | 17 |
| Amine 68 | 73 | 32.058 | 253 |                      |    | 108  | 17 |
| Amine 67 | 57 | 31.793 | 255 | Unknown              |    | 1225 | 17 |
| Amine 70 | 75 | 32.245 | 255 |                      |    | 234  | 17 |
| Amine 73 | 60 | 33.869 | 266 | Unknown              |    | 792  | 18 |
| Amine 75 | 62 | 35.881 | 267 | Unknown              |    | 533  | 18 |
| Amine 72 | 59 | 33.041 | 269 | Unknown              |    | 638  | 18 |
| Amine 74 | 61 | 35.15  | 269 | Unknown              |    | 342  | 18 |

**Table S4.** CHN(O)S analysis of aminated oil, aminated oil after excluding methanol (MeOH), and aminated oil after excluding both MeOH and H<sub>2</sub>O.

| Sample                                       | CHNO(S) Analysis |      |     |      |
|----------------------------------------------|------------------|------|-----|------|
|                                              | C                | H    | N   | O    |
|                                              | %                | %    | %   | %    |
| Aminated Oil                                 | 63.7             | 10.9 | 5.0 | 20.4 |
| Aminated Oil without MeOH                    | 74.8             | 10.2 | 7.2 | 7.9  |
| Aminated Oil without MeOH & H <sub>2</sub> O | 81.0             | 11.1 | 7.8 | 0.1  |

**Table S5.** The boiling points of selected chemicals in the aminated oil. The data were obtained using Aspen Plus 12.

| Corresponding Final Products         | Boiling Point of Final Products (°C) |
|--------------------------------------|--------------------------------------|
| Methanol                             | 65                                   |
| Pentane                              | 36                                   |
| Hexylamine                           | 131                                  |
| <a href="#">1,7-heptanediamine</a>   | <a href="#">214</a>                  |
| Hexane                               | 69                                   |
| Heptylamine                          | 157                                  |
| <a href="#">1,8-Octanediamine</a>    | <a href="#">238</a>                  |
| Heptane                              | 98                                   |
| Octylamine                           | 180                                  |
| <a href="#">1, 9-Nonanediamie</a>    | <a href="#">255</a>                  |
| Octane                               | 126                                  |
| Nonylamine                           | 202                                  |
| <a href="#">1,10-Diaminodecane</a>   | <a href="#">269</a>                  |
| Nonane                               | 151                                  |
| Decylamine                           | 259                                  |
| <a href="#">1,11-Diaminodecane</a>   | <a href="#">288</a>                  |
| Decane                               | 174                                  |
| Undecylamine                         | 242                                  |
| <a href="#">1,12-Diaminododecane</a> | <a href="#">303</a>                  |
| Dodecylamine                         | 259                                  |

**Table S6.** Economic analysis of the proposed route to produce amines from waste polyolefins. The prices of the chemicals were obtained from the resources cited in the main text and listed below:

<https://www.recyclingmarkets.net>

<https://pubs.usgs.gov/periodicals/mcs2022/mcs2022-nitrogen.pdf>

<https://www.energy.gov/eere/fuelcells/hydrogen-shot>

| Feedstock  |        |       |              | Products   |        |       |        |              | Potential Profit |
|------------|--------|-------|--------------|------------|--------|-------|--------|--------------|------------------|
| Feedstocks | \$/ton | Input | Output Value | Products   | \$/ton | ratio | Output | Output Value |                  |
| HDPE       | 125    | 1.00  | 125.0        | Aromatic   | 780    | 14.5  | 0.2    | 131.2        |                  |
| CO         | 150    | 0.19  | 28.5         | Paraffins  | 610    | 20.9  | 0.2    | 147.9        |                  |
| NH3        | 510    | 0.09  | 45.9         | Monoamines | 2000   | 29.8  | 0.3    | 691.4        |                  |
| H2         | 1000   | 0.02  | 20.0         | Diamines   | 3500   | 10.0  | 0.1    | 406.0        |                  |
|            |        |       |              | Gas        | 600    | 9.0   | 0.1    | 62.6         |                  |
|            |        |       |              | Solid      |        | 2.0   | 0.0    |              |                  |
| Sum        |        | 1.30  | 219.4        |            |        | 86.2  |        | 1439.2       | 1219.8           |

**Table S7.** Estimated cost of the processes.

|                     | CAPEX (\$MM) <sup>a</sup> | Scale (kton/yr) <sup>a</sup> | CAPEX at 100 ton/yr (\$MM) |
|---------------------|---------------------------|------------------------------|----------------------------|
| Pyrolysis           | 38.10                     | 36.50                        | 69.75                      |
| Hydroformylation    | 32.00                     | 214.10                       | 20.27                      |
| Hydrogenation       | 22.50                     | 21.30                        | 56.91                      |
| Pyo oil Separation  | 6.60                      | 500.00                       | 2.51                       |
| Products Separation | 3.90                      | 120.00                       | 3.50                       |

a: Li, H., Wu, J., Jiang, Z., Ma, J., Zavala, V. M., Landis, C. R., ... and Huber, G. W. (2023). Hydroformylation of pyrolysis oils to aldehydes and alcohols from polyolefin waste. *Science*, 381(6658), 660-666.

The sixth scaling rule was used to account for economies of scale when evaluating CAPEX of facilities:

$$\alpha^t = \bar{\alpha}^t \cdot \left( \frac{\xi^t}{\bar{\xi}^t} \right)^\beta$$

Here,  $\alpha$  represents CAPEX of technology  $t$  at a scale  $\xi$ .  $\bar{\xi}$  is the CAPEX of such technology at base case scale  $\bar{\alpha}$ , and  $\beta$  is the scaling factor, which assumed to be 0.6 in this work
